# Supplementary material for: Synthesis, Physicochemical Properties, and Biological Activities of 4-(S-Methyl-N-(2,2,2-Trifluoroacetyl)Sulfilimidoyl) Anthranilic Diamide
Source: PubMed Central journal article supplement (PMC6804157; doi:10.3390/molecules24193451), 2019-09-23
Supplement: molecules-24-03451-s001.pdf [file molecules-24-03451-s001.pdf]

# Synthesis, Physicochemical Properties, and Biological Activities of 4-(S-methyl-N-(2,2,2-trifluoroacetyl)sulfilimidoyl) Anthranilic Diamide

Hwan Jung Lim<sup>1</sup>, Won Hyung Lee,<sup>2</sup> Seong Jun Park<sup>1,\*</sup>

<sup>1</sup>Bio & Drug Discovery Division, Korea Research Institute of Chemical Technology (KRICT), 141 Gajeong-ro, Yuseong-gu, Daejeon 34114, Korea

<sup>2</sup>Central Research Institute, Kyung Nong Co. Ltd., 34-14 Summeori-gil, Kyongju 38175, Kyongsangbuk-do, Korea

Email: [sjunpark@kRICT.re.kr](mailto:sjunpark@kRICT.re.kr)

## Supporting information

|                                                                                                  |    |
|--------------------------------------------------------------------------------------------------|----|
| Figure S1: <sup>1</sup> H, <sup>13</sup> C and <sup>19</sup> F NMR of compound <b>9-16</b> ..... | 1  |
| Table S1 and S2: Larvicidal activity against Spodoptera ( <b>14</b> and <b>15a</b> ).....        | 11 |
| Table S3. Physical properties of organosulfur-substituted anthranilic diamides .....             | 15 |
| Figure S2: pH-metric Log P of compounds <b>14-16</b> .....                                       | 16 |
| References.....                                                                                  | 37 |

Figure S1:  $^1\text{H}$ ,  $^{13}\text{C}$  and  $^{19}\text{F}$  NMR of compound **9-16**

$^1\text{H}$  and  $^{13}\text{C}$  NMR of compound **9**

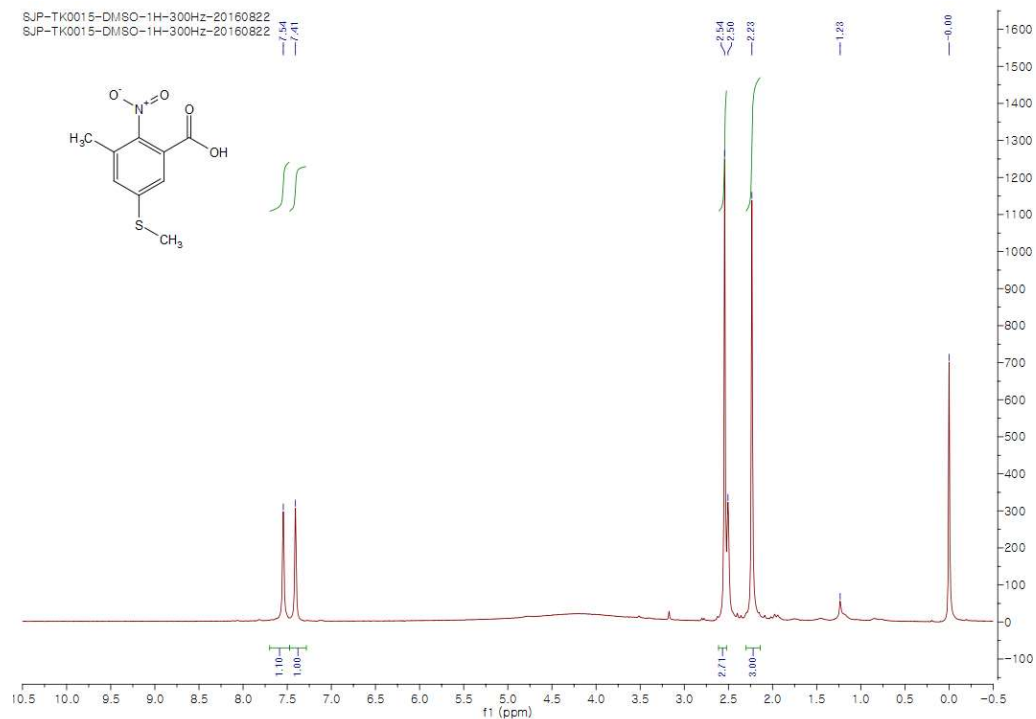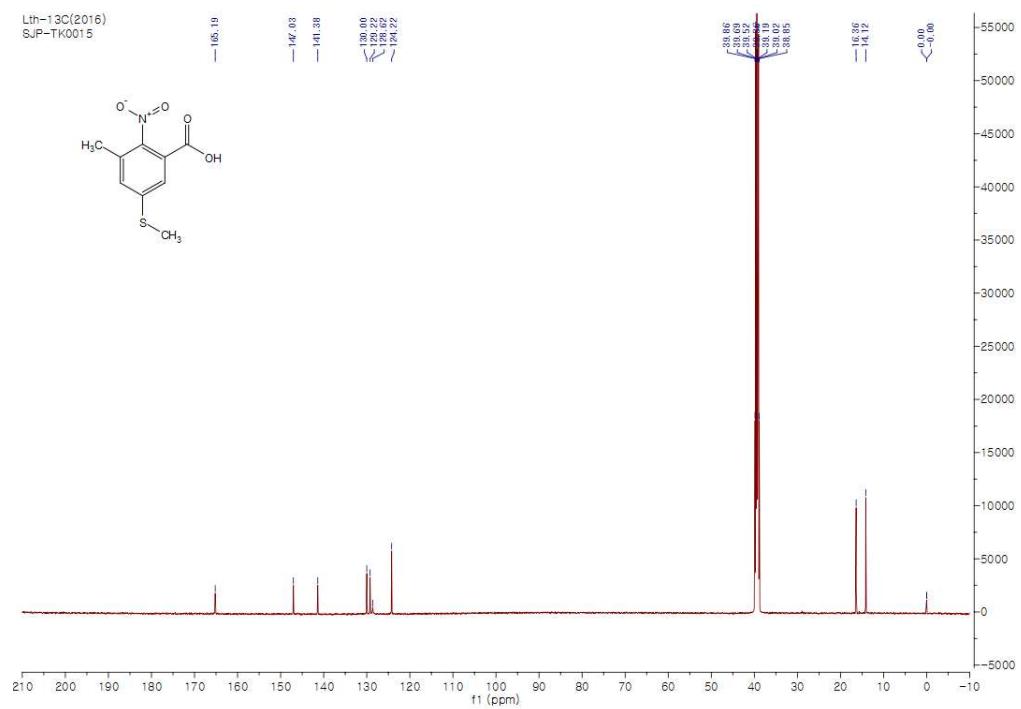

<sup>1</sup>H and <sup>13</sup>C NMR of compound 11

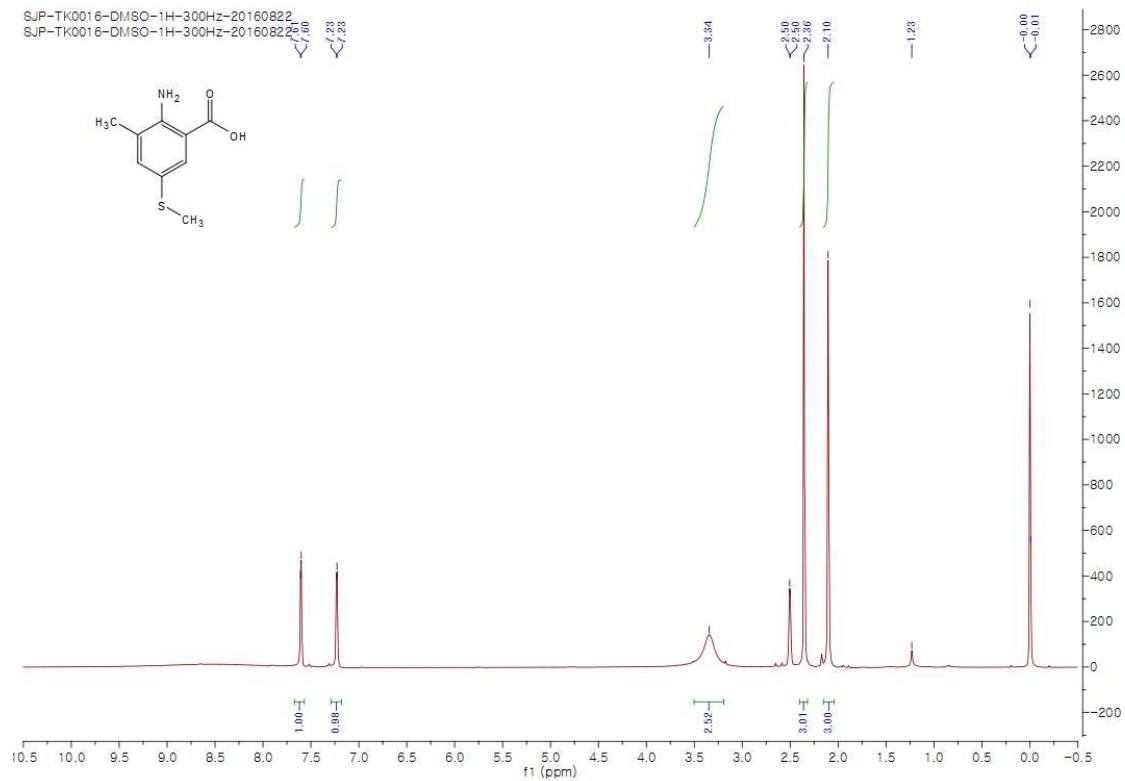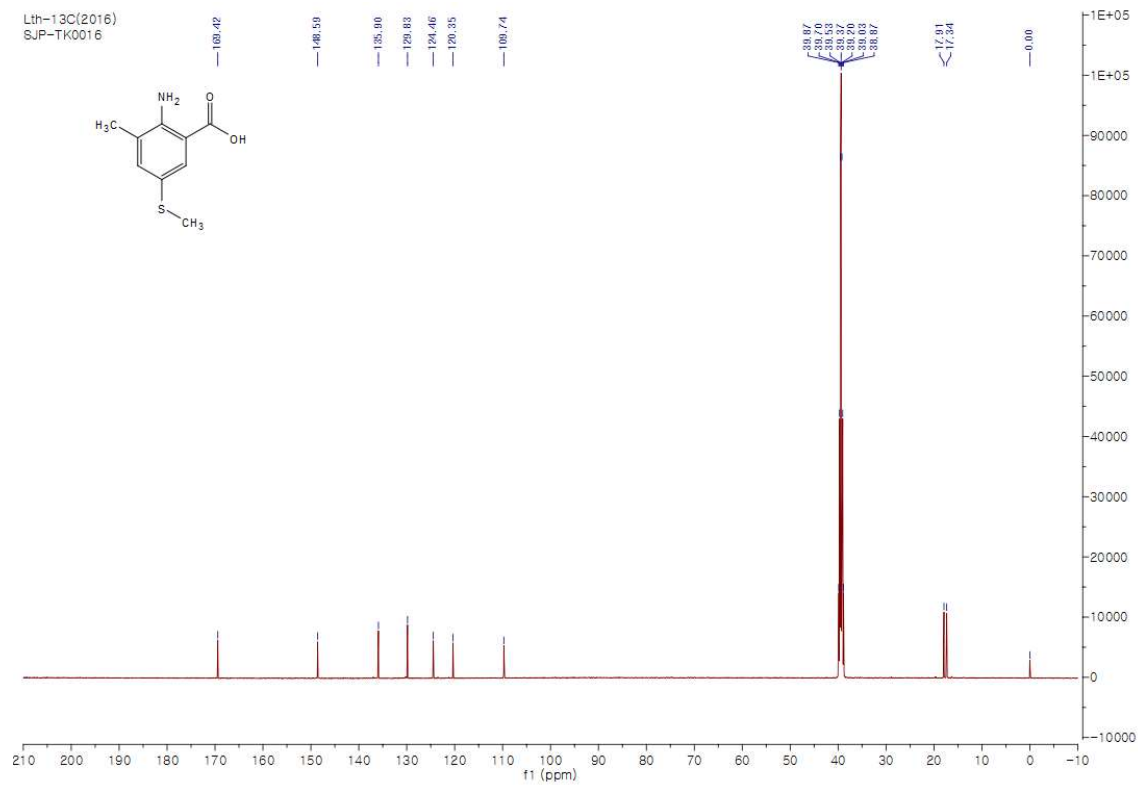

<sup>1</sup>H and <sup>13</sup>C NMR of compound 12

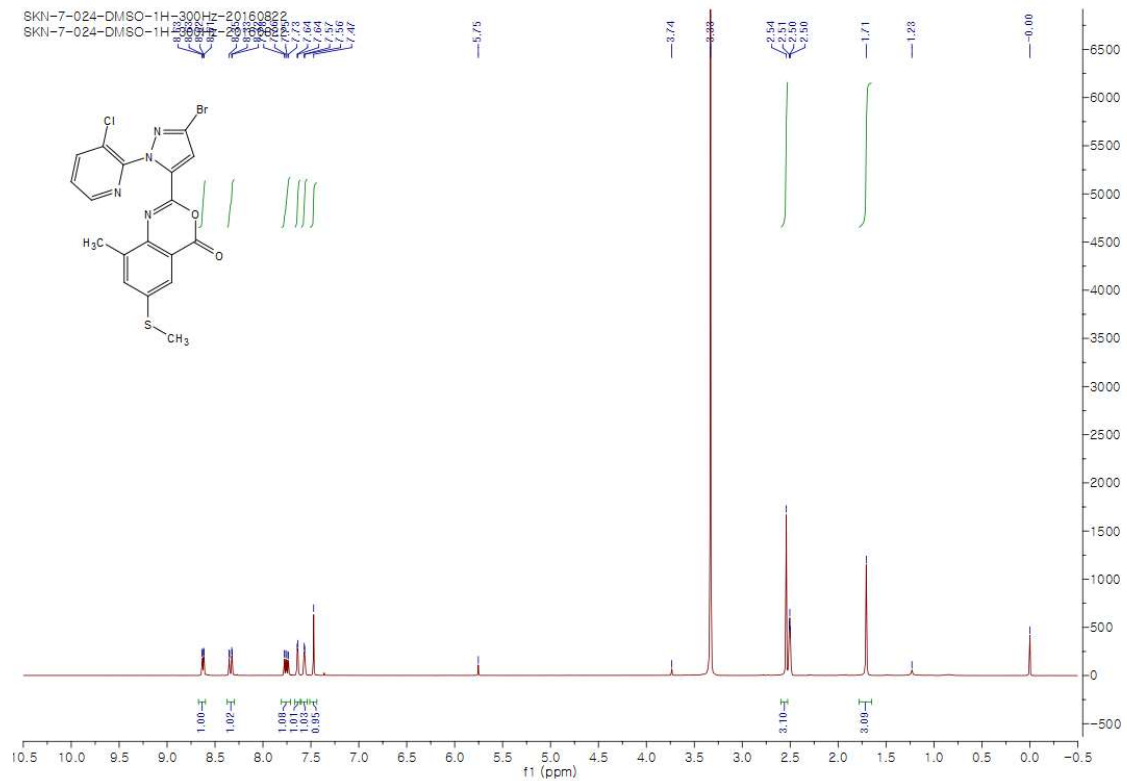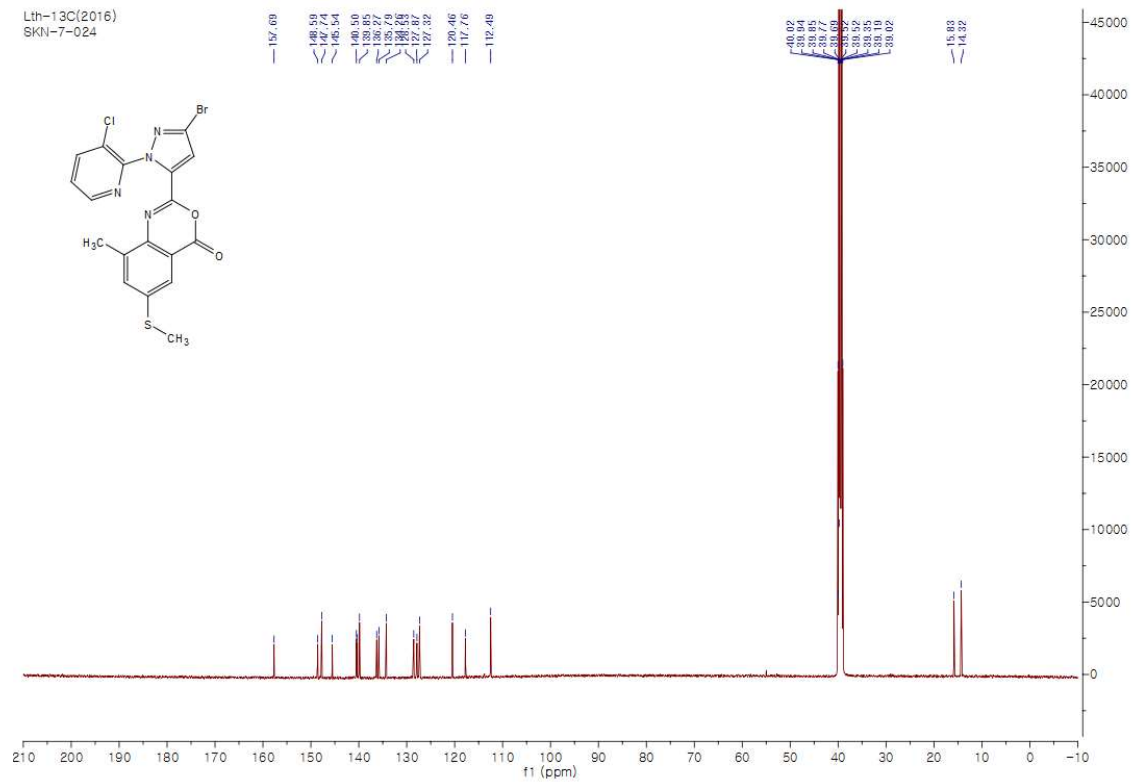

<sup>1</sup>H and <sup>13</sup>C NMR of compound 14

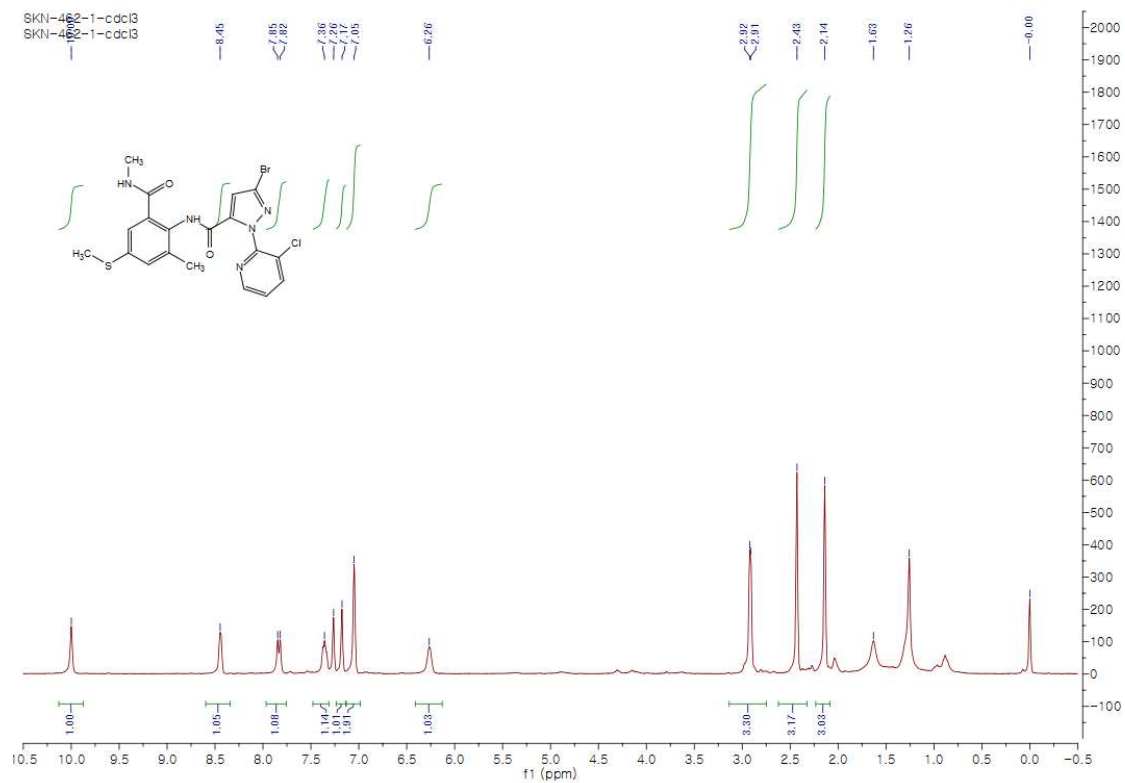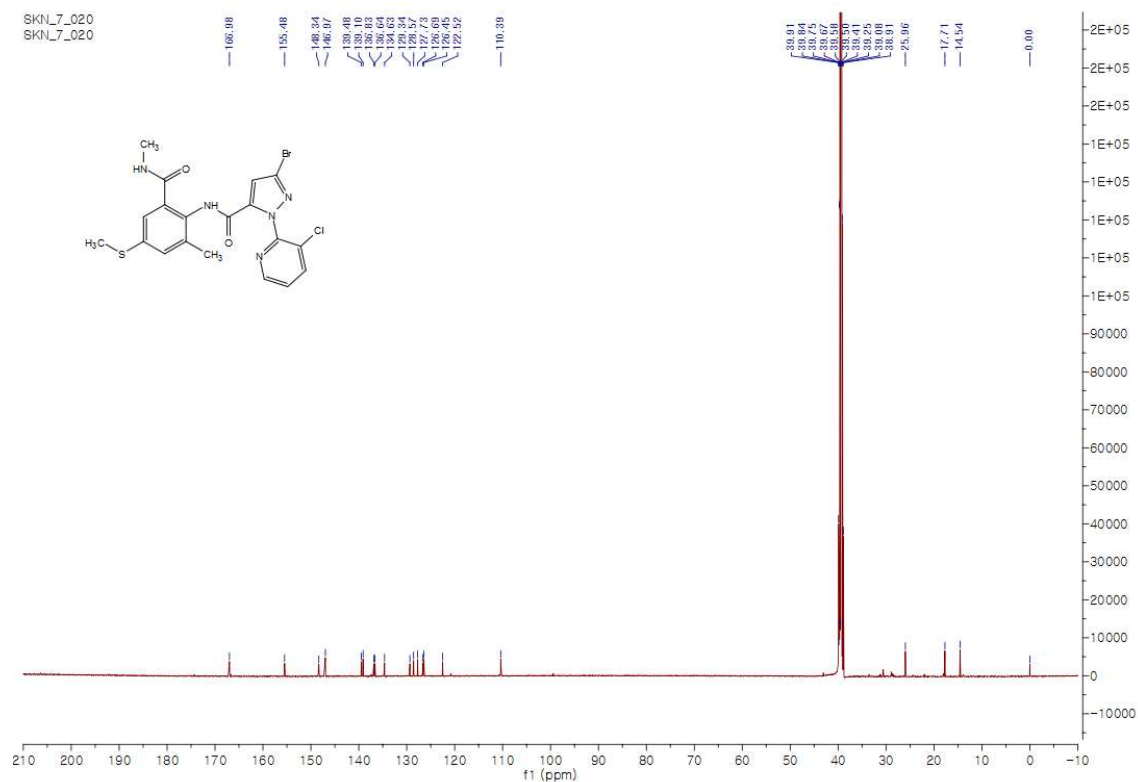

<sup>1</sup>H and <sup>13</sup>C NMR of compound 15a

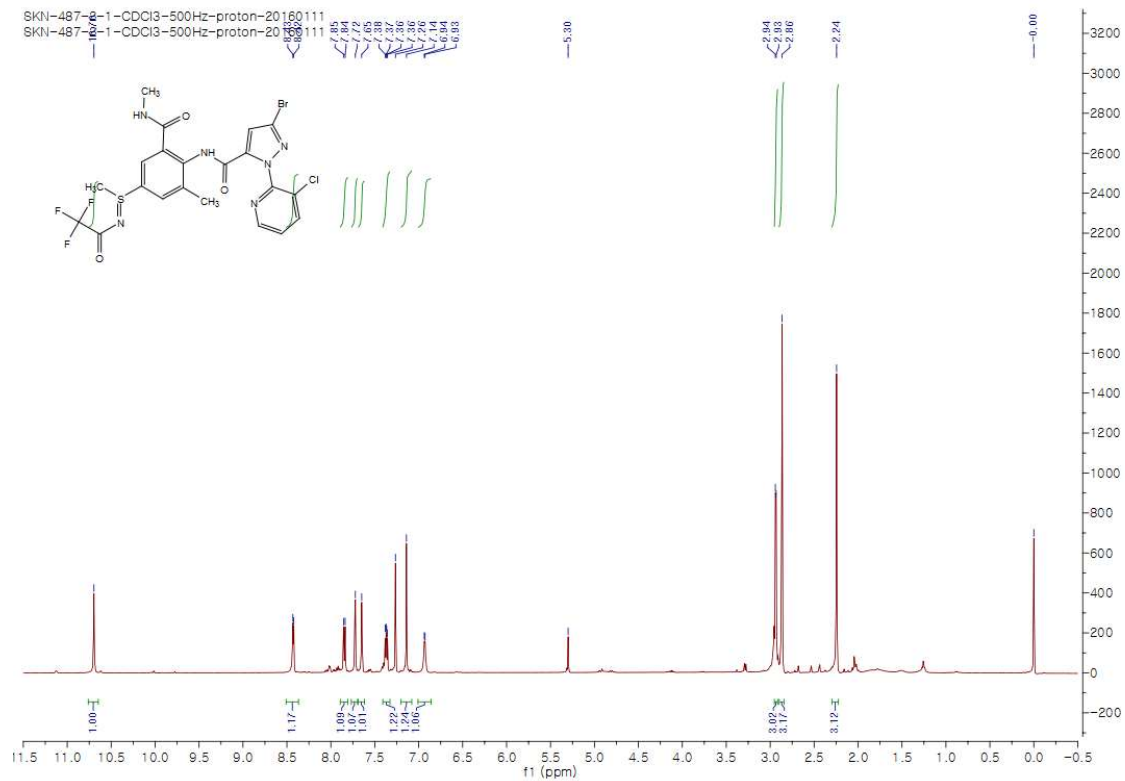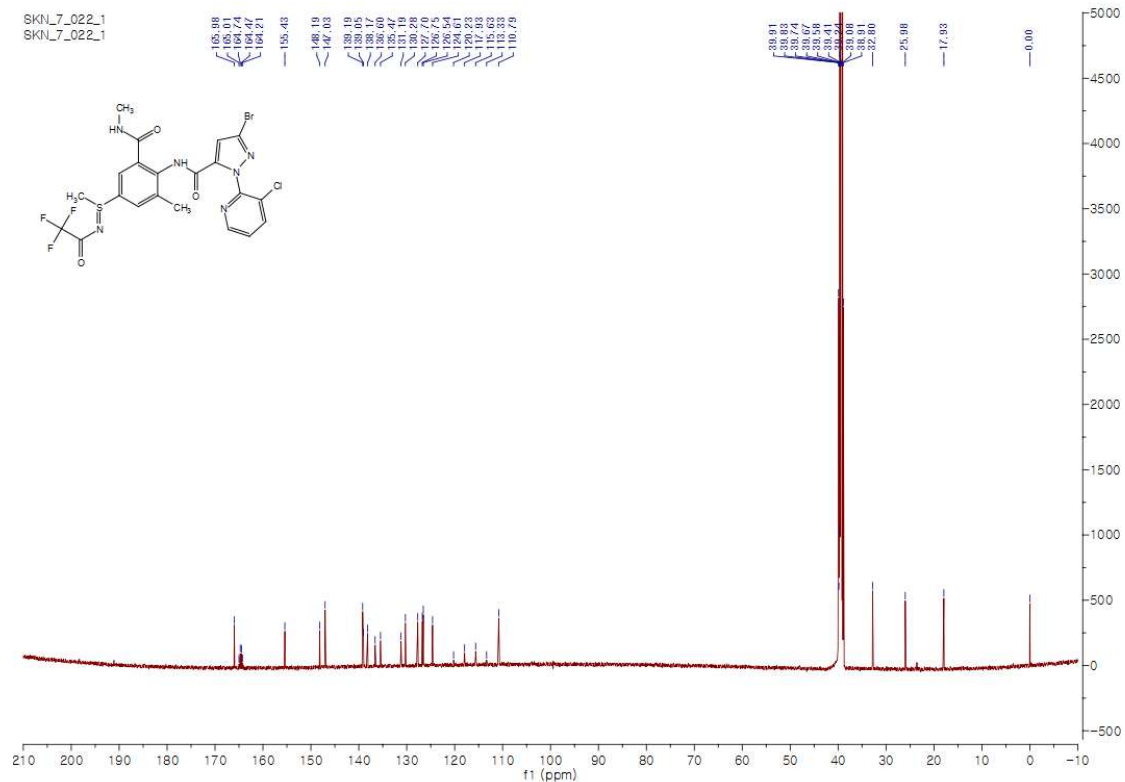

# $^{19}\text{F}$ NMR of compound **15a**

Lth-19F(2016)  
SKN-7-022-1

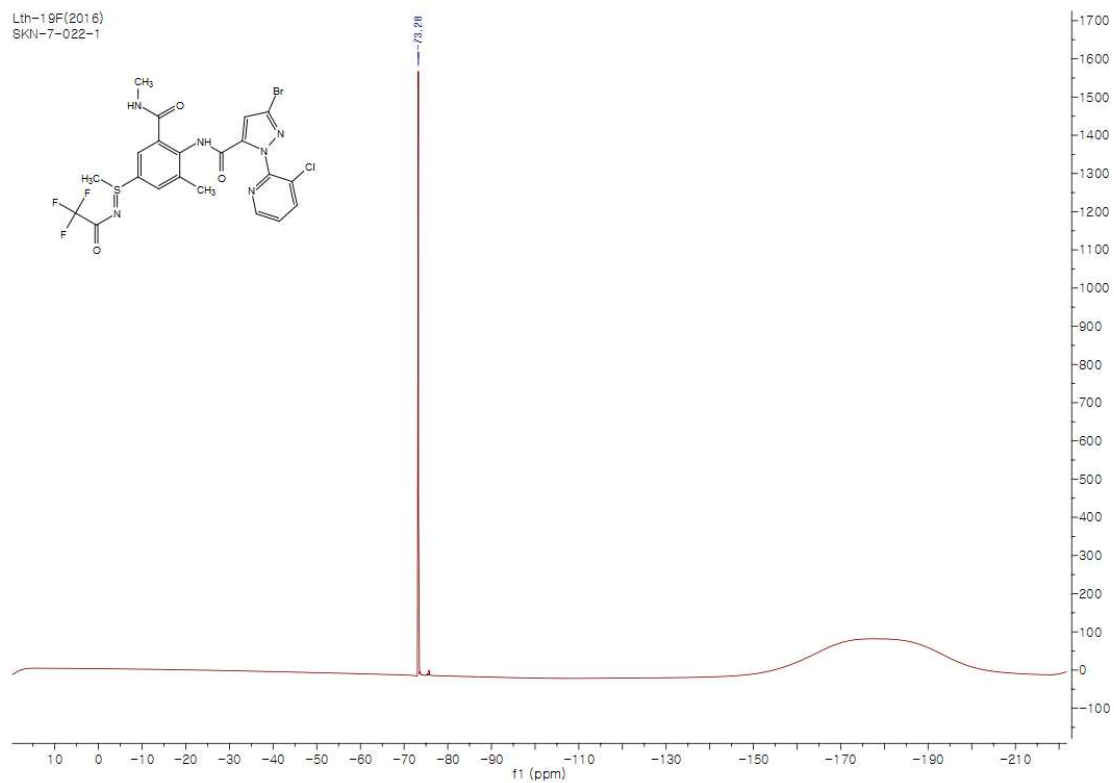

<sup>1</sup>H and <sup>13</sup>C NMR of compound **15b**

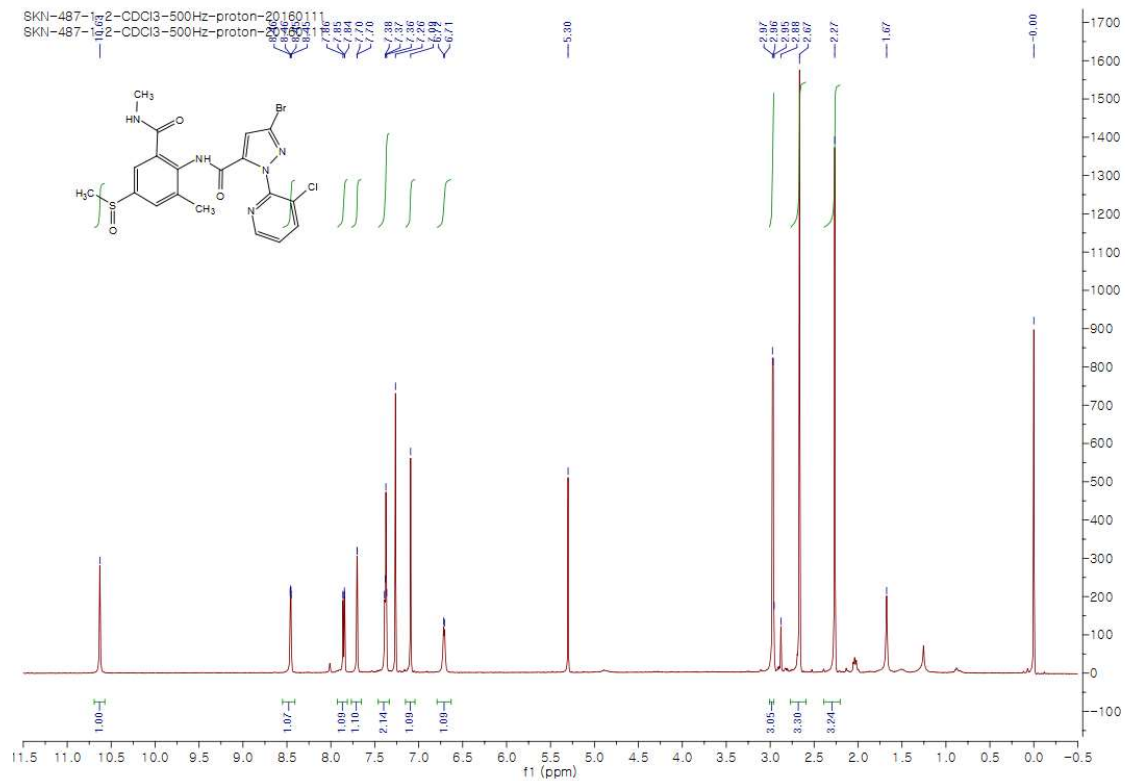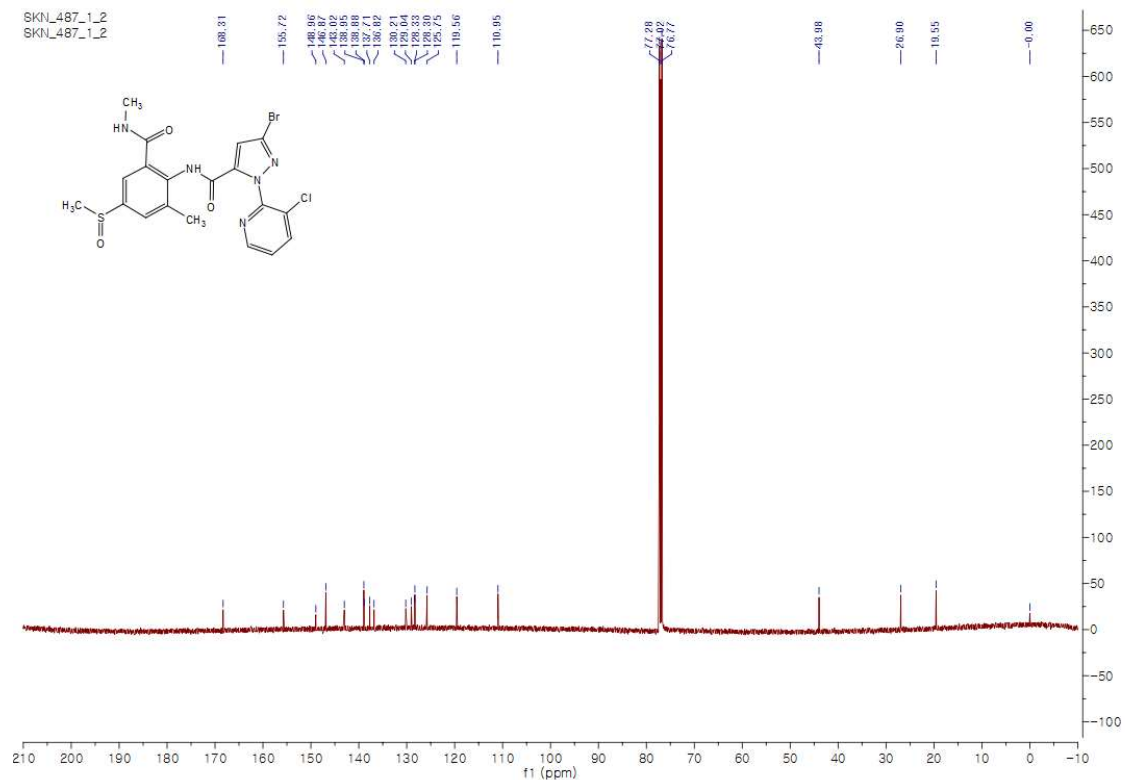



<sup>1</sup>H and <sup>13</sup>C NMR of compound 16a

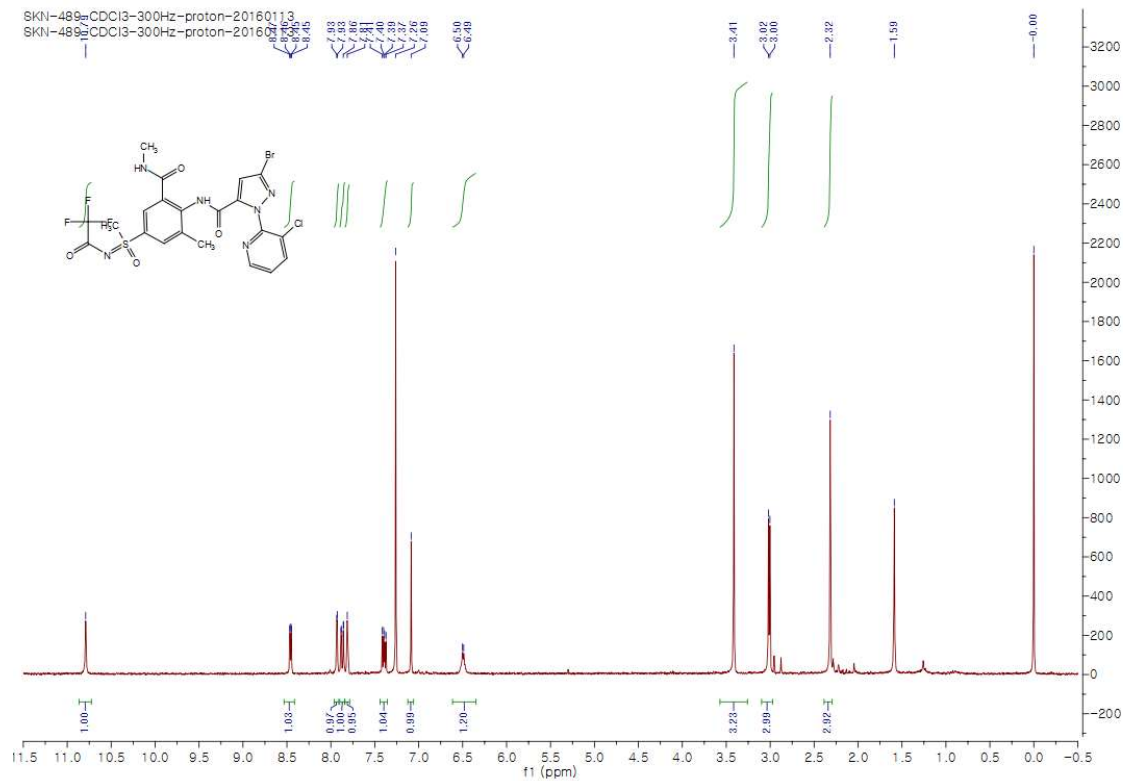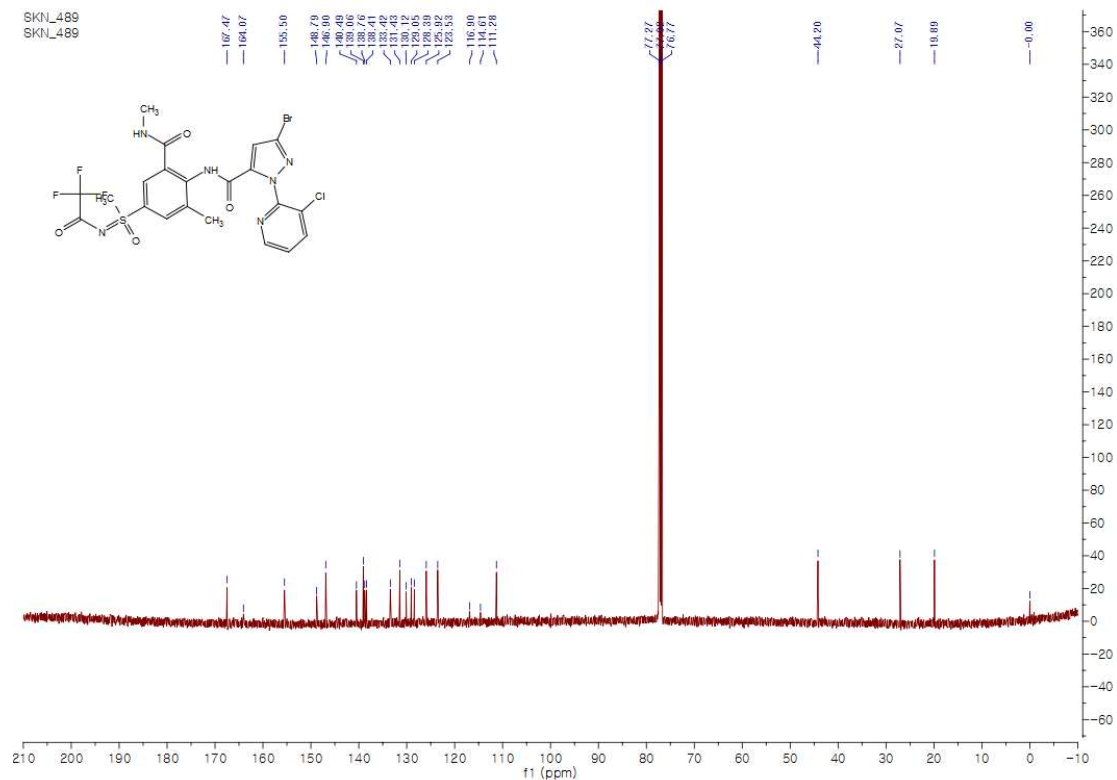

# $^{19}\text{F}$ NMR of compound **16a**

Lth-19F(2016)  
SKN-7-027

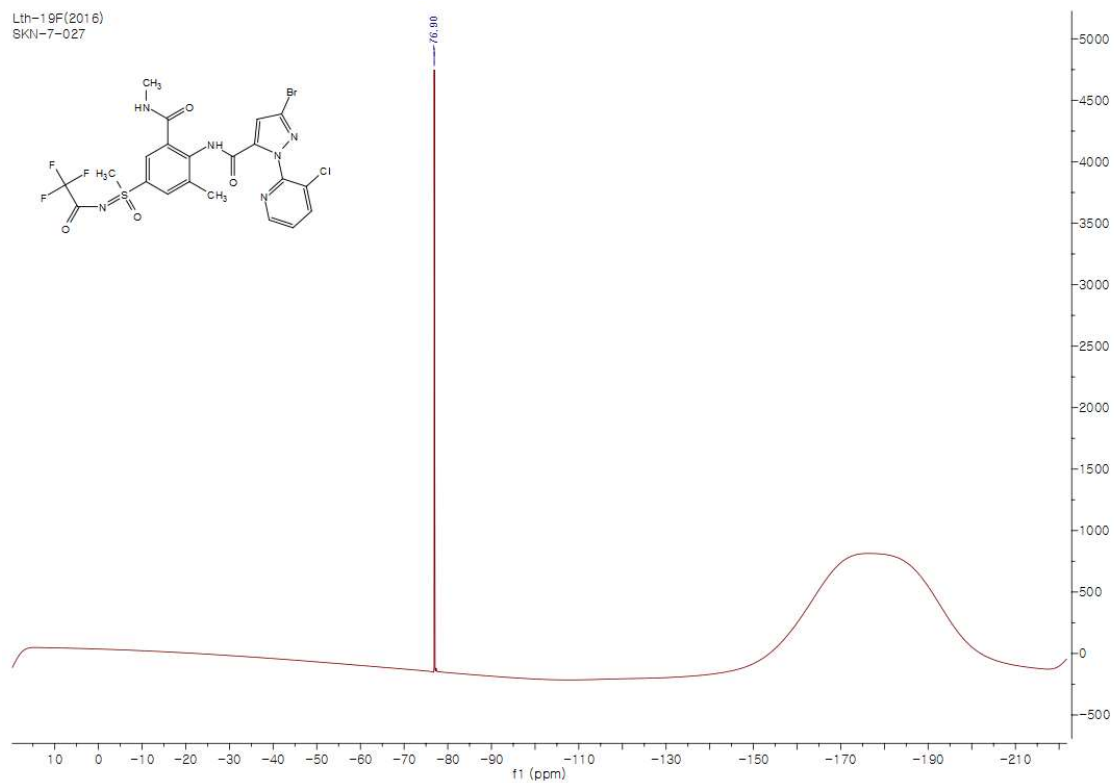

**<sup>1</sup>H and <sup>13</sup>C NMR of compound 16b**

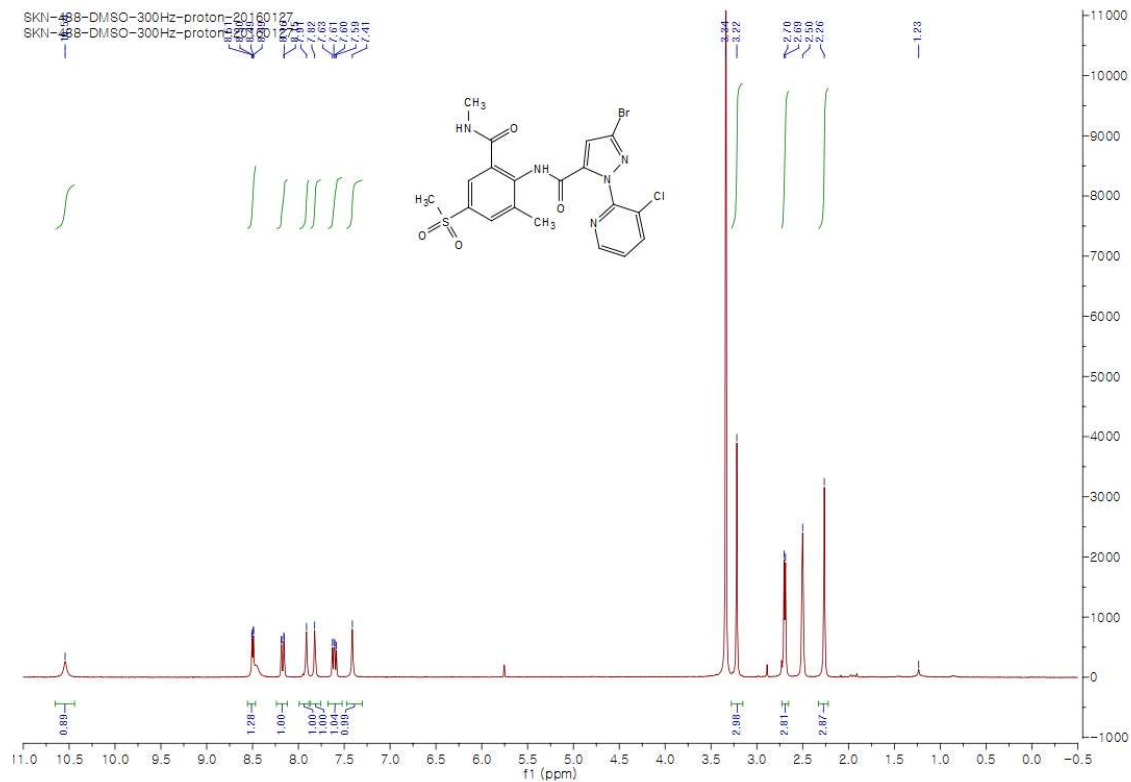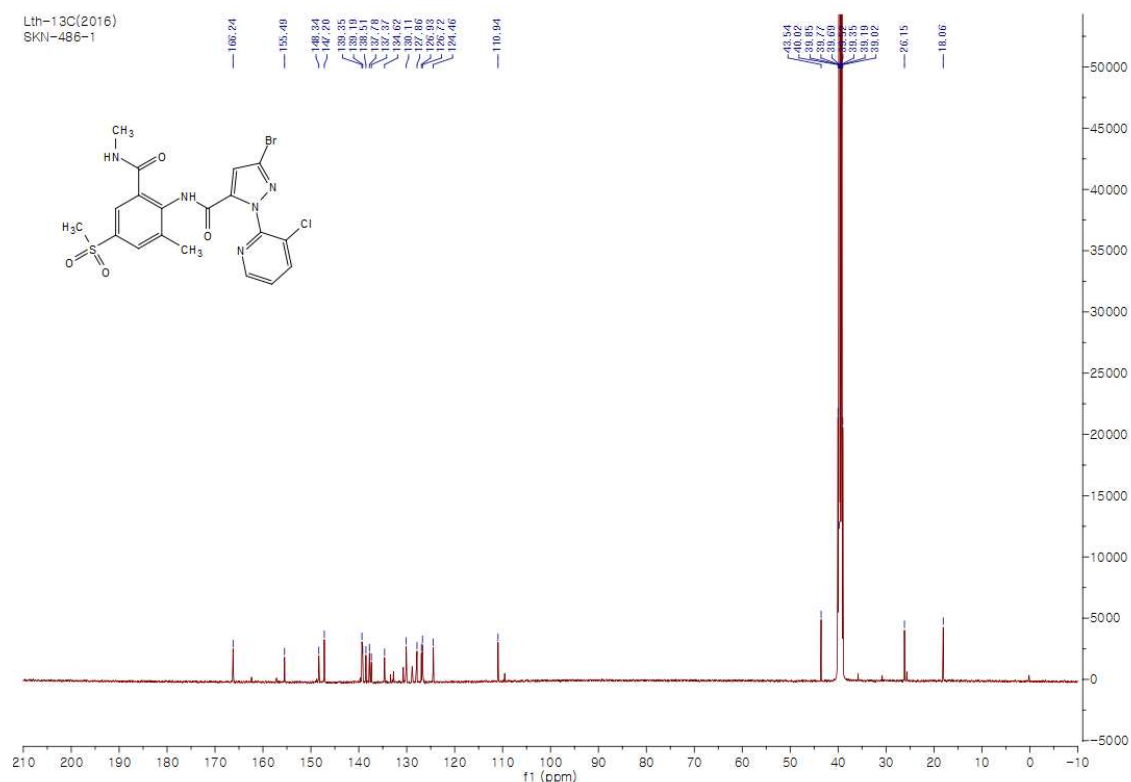

**Table S1 and S2:** Larvicidal activity against Spodoptera (**14** and **15a**)

The larvicidal activities of synthesized compounds were evaluated by the leaf-dip procedure.<sup>6</sup> The aqueous solution of prepared compounds and chlorantraniliprole in acetone (H<sub>2</sub>O : acetone = 95 : 5) were sprayed to a cabbage leave placed on moistened filter paper (disc, diameter 8.8 cm) in petri dishes. After allowing to dry, the dishes were infested with 10 *Spodoptera litura* (third-instar). After 1, 2, 3, and 4 days, percentage of mortalities was evaluated. The treatments were replicated three times. For negative control, larvicidal activities were 0 % at each time. Ref. is chlorantraniliprole as a positive control.

**Table S1.** Larvicidal activity depend on time

| Entry | Compd      | Concentration (ppm) | against the 3 <sup>rd</sup> instar larvae of <i>Spodoptera litura</i> |    |    |         |
|-------|------------|---------------------|-----------------------------------------------------------------------|----|----|---------|
|       |            |                     | Larvicidal activity (%) at <b>24 h</b>                                |    |    |         |
|       |            |                     | 1                                                                     | 2  | 3  | Average |
| 1     | <b>14</b>  | 50                  | 0                                                                     | 0  | 0  | 0       |
| 2     | Ref.       | 25                  | 60                                                                    | 30 | 50 | 46.7    |
| 3     | <b>15a</b> | 50                  | 0                                                                     | 0  | 0  | 0       |
| 4     | Ref.       | 25                  | 10                                                                    | 20 | 10 | 13.3    |

  

| Entry | Compd     | Concentration (ppm) | against the 3 <sup>rd</sup> instar larvae of <i>Spodoptera litura</i> |   |    |         |
|-------|-----------|---------------------|-----------------------------------------------------------------------|---|----|---------|
|       |           |                     | Larvicidal activity (%) at <b>48 h</b>                                |   |    |         |
|       |           |                     | 1                                                                     | 2 | 3  | Average |
| 1     | <b>14</b> | 50                  | 20                                                                    | 0 | 20 | 13.3    |

|   |            |    |    |    |    |      |
|---|------------|----|----|----|----|------|
| 2 | Ref.       | 25 | 90 | 80 | 90 | 86.7 |
| 3 | <b>15a</b> | 50 | 0  | 0  | 0  | 0    |
| 4 | Ref.       | 25 | 50 | 70 | 80 | 66.7 |

| against the 3 <sup>rd</sup> instar larvae of Spodoptera litura |            |                     |                                        |     |     |         |
|----------------------------------------------------------------|------------|---------------------|----------------------------------------|-----|-----|---------|
| Entry                                                          | Compd      | Concentration (ppm) | Larvicidal activity (%) at <b>72 h</b> |     |     |         |
|                                                                |            |                     | 1                                      | 2   | 3   | Average |
| 1                                                              | <b>14</b>  | 50                  | 70                                     | 30  | 40  | 46.7    |
| 2                                                              | Ref.       | 25                  | 100                                    | 100 | 100 | 100     |
| 3                                                              | <b>15a</b> | 50                  | 50                                     | 40  | 50  | 46.7    |
| 4                                                              | Ref.       | 25                  | 100                                    | 100 | 100 | 100     |

| against the 3 <sup>rd</sup> instar larvae of Spodoptera litura |            |                     |                                        |     |     |         |
|----------------------------------------------------------------|------------|---------------------|----------------------------------------|-----|-----|---------|
| Entry                                                          | Compd      | Concentration (ppm) | Larvicidal activity (%) at <b>96 h</b> |     |     |         |
|                                                                |            |                     | 1                                      | 2   | 3   | Average |
| 1                                                              | <b>14</b>  | 50                  | 80                                     | 70  | 70  | 73.3    |
| 2                                                              | Ref.       | 25                  | 100                                    | 100 | 100 | 100     |
| 3                                                              | <b>15a</b> | 50                  | 50                                     | 50  | 60  | 53.3    |
| 4                                                              | Ref.       | 25                  | 100                                    | 100 | 100 | 100     |

**Table S2.** Picture of eating area

| Entry | Compd                                             | Pictures of eating area_ after 96 h<br>(The 3 <sup>rd</sup> instar stage larvae of <i>Spodoptera litura</i> ) |
|-------|---------------------------------------------------|---------------------------------------------------------------------------------------------------------------|
| 1     | <b>14</b><br>(sulfide)                            | <br>5 - 10 % eating         |
| 2     | Ref.<br>positive control<br>(chlorantraniliprole) | <br>0 – 5 % eating         |
|       | Negative control                                  |                           |

| Entry | Compd                                                     | Pictures of eating area_ after 96 h<br>(The 3 <sup>rd</sup> instar stage larvae of Spodoptera litura)                                  |
|-------|-----------------------------------------------------------|----------------------------------------------------------------------------------------------------------------------------------------|
| 2     | <b>15a</b><br>( <i>N</i> -trifluoroacetyl<br>sulfilimine) |  <p data-bbox="901 640 1088 682">5 - 10 % eating</p> |
| 6     | Ref.<br>positive control<br>(chlorantraniliprole)         |  <p data-bbox="901 945 1088 987">0 - 5 % eating</p>  |
|       | Negative control                                          |                                                     |

**Table S3. Physical properties of organosulfur-substituted anthranilic diamides**

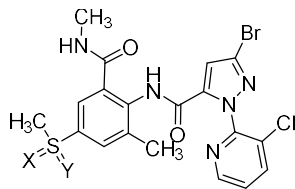

**14 -16**

| Entry | Compd<br>(Functionality)    | X                  | Y  | Solubility <sup>a,b</sup><br>(Equilibrium) | Log P <sup>e,d</sup> | Permeability <sup>e</sup> |
|-------|-----------------------------|--------------------|----|--------------------------------------------|----------------------|---------------------------|
| 1     | <b>14</b><br>(Sulfide)      | ••                 | •• | 5.40 ± 0.794 μM<br>(2.67 ± 0.393 μg/mL)    | 3.45                 | - 4.3 ± 0.047             |
| 2     | <b>15a</b><br>(Sulfilimine) | NCOCF <sub>3</sub> | •• | 397.3 ± 14.4 μM<br>(240.7 ± 8.737 μg/mL)   | 3.74                 | - 4.5 ± 0.059             |
| 3     | <b>15b</b><br>(Sulfoxide)   | O                  | •• | 486.1 ± 15.8 μM<br>(248.3 ± 8.083 μg/mL)   | 2.59                 | - 4.8 ± 0.037             |
| 4     | <b>16a</b><br>(Sulfoximine) | NCOCF <sub>3</sub> | O  | 396.8 ± 14.9 μM<br>(246.7 ± 9.292 μg/mL)   | 4.95                 | - 4.7 ± 0.075             |
| 5     | <b>16b</b><br>(Sulfone)     | O                  | O  | 124.5 ± 16.5 μM<br>(65.6 ± 8.693 μg/mL)    | 3.04                 | - 4.5 ± 0.030             |
| 6     | Chlorantraniliprole         |                    |    | 21.5 ± 1.59 μM<br>(10.4 ± 0.771 μg/mL)     | 5.25                 | - 4.3 ± 0.046             |
| 7     | Cyantraniliprole            |                    |    | 377.9 ± 14.6 μM<br>(179.0 ± 6.928 μg/mL)   | 3.50                 | - 4.4 ± 0.077             |

<sup>a</sup>Method for determination of equilibrium solubility: μSOL<sup>25</sup>; <sup>b</sup>at 25 °C and pH 7.4; <sup>c</sup>Using ACD / Labs T3 method (pH – metric); <sup>d</sup>for graphs, please see the supporting information, <sup>e</sup>Method for determination of permeability: PAMPA



Figure S2: pH-metric Log P of compounds **14-16**

pH-metric Log P of compounds **14**

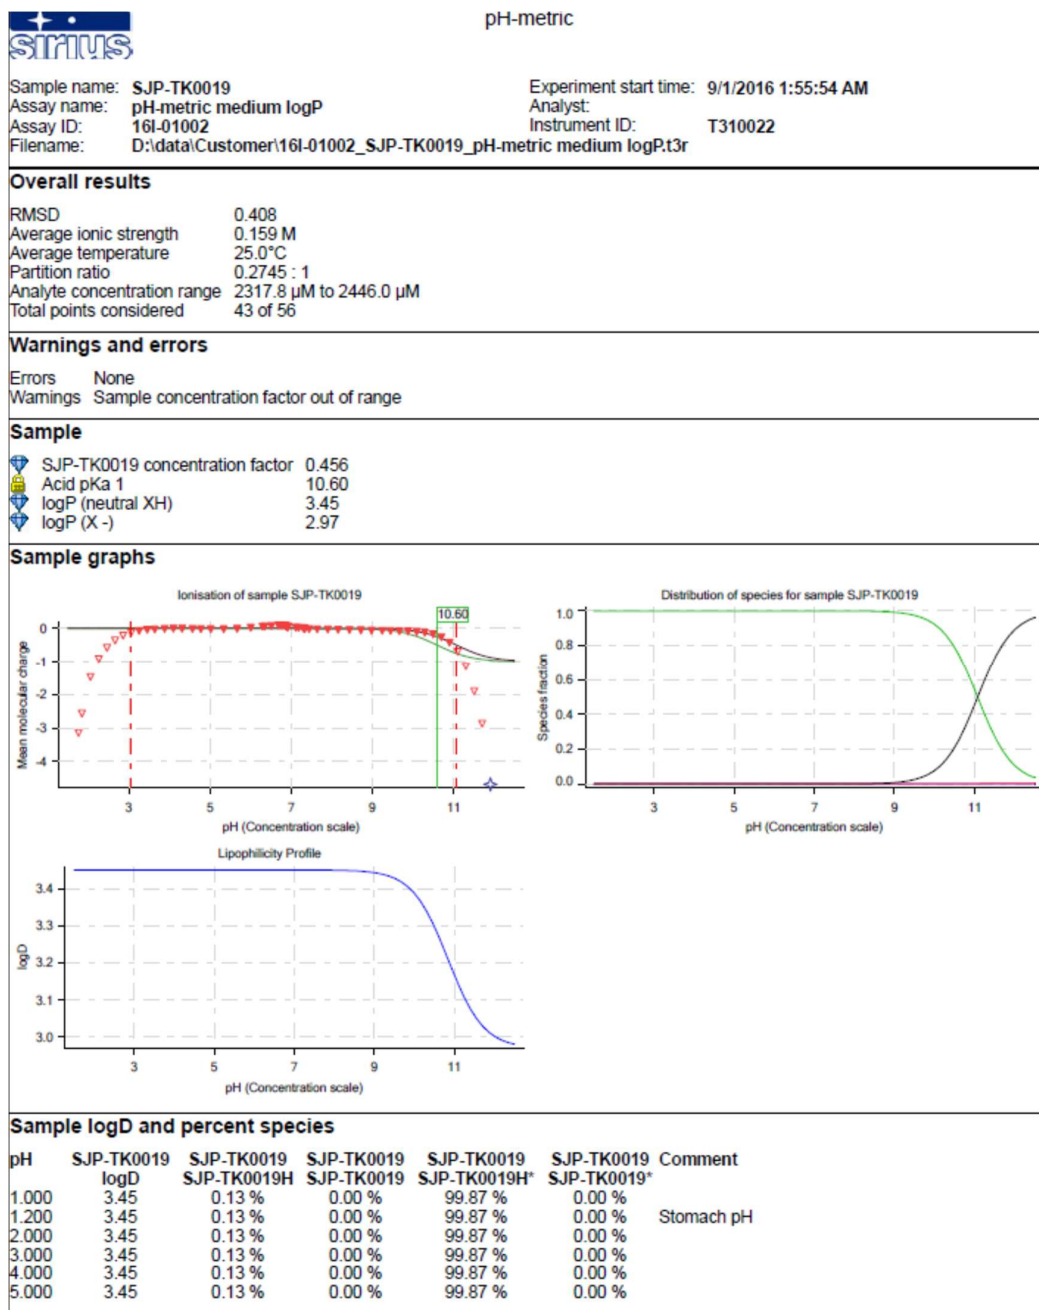

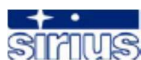

pH-metric

Sample name: SJP-TK0019  
Assay name: pH-metric medium logP  
Assay ID: 16I-01002  
Filename: D:\data\Customer\16I-01002\_SJP-TK0019\_pH-metric medium logP.t3r

Experiment start time: 9/1/2016 1:55:54 AM  
Analyst:  
Instrument ID: T310022

Sample logD and percent species (continued)

| pH     | SJP-TK0019<br>logD | SJP-TK0019<br>SJP-TK0019H | SJP-TK0019<br>SJP-TK0019 | SJP-TK0019<br>SJP-TK0019H* | SJP-TK0019<br>SJP-TK0019* | Comment  |
|--------|--------------------|---------------------------|--------------------------|----------------------------|---------------------------|----------|
| 6.000  | 3.45               | 0.13 %                    | 0.00 %                   | 99.87 %                    | 0.00 %                    |          |
| 6.500  | 3.45               | 0.13 %                    | 0.00 %                   | 99.87 %                    | 0.00 %                    |          |
| 7.000  | 3.45               | 0.13 %                    | 0.00 %                   | 99.86 %                    | 0.01 %                    |          |
| 7.400  | 3.45               | 0.13 %                    | 0.00 %                   | 99.85 %                    | 0.02 %                    | Blood pH |
| 8.000  | 3.45               | 0.13 %                    | 0.00 %                   | 99.79 %                    | 0.08 %                    |          |
| 9.000  | 3.44               | 0.13 %                    | 0.00 %                   | 99.05 %                    | 0.82 %                    |          |
| 10.000 | 3.39               | 0.12 %                    | 0.03 %                   | 92.19 %                    | 7.67 %                    |          |
| 11.000 | 3.17               | 0.07 %                    | 0.18 %                   | 54.47 %                    | 45.29 %                   |          |
| 12.000 | 3.00               | 0.01 %                    | 0.35 %                   | 10.70 %                    | 88.94 %                   |          |

Carbonate and acidity

Carbonate 0.451 mM  
Acidity error 0.286 mM

Other graphs

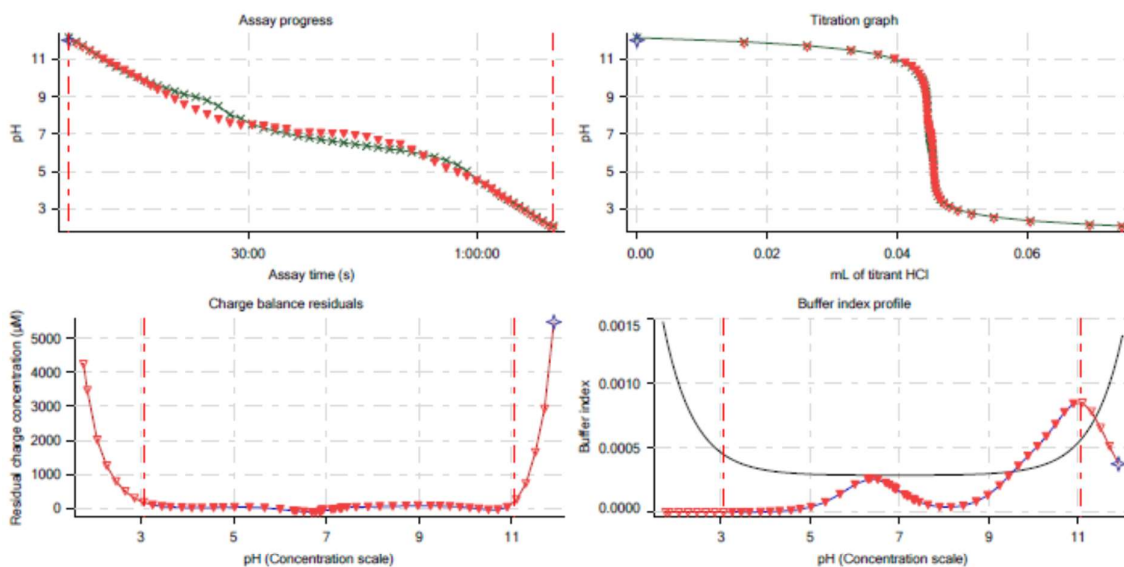

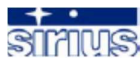

pH-metric

Sample name: SJP-TK0019  
Assay name: pH-metric medium logP  
Assay ID: 16I-01002  
Filename: D:\data\Customer\16I-01002\_SJP-TK0019\_pH-metric medium logP.t3r

Experiment start time: 9/1/2016 1:55:54 AM  
Analyst:  
Instrument ID: T310022

Other graphs (continued)

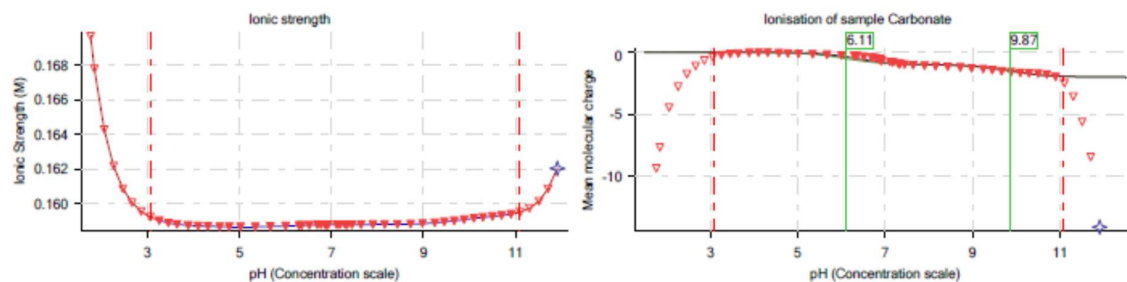

pH-metric Log P of compounds **15b**

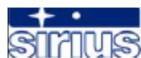

pH-metric

Sample name: SKN-7-022-2 Experiment start time: 9/1/2016 9:03:46 AM  
 Assay name: pH-metric medium logP Analyst:  
 Assay ID: 16I-01008 Instrument ID: T310022  
 Filename: D:\data\Customer\16I-01008\_SKN-7-022-2\_pH-metric medium logP.t3r

**Overall results**

RMSD 0.301  
 Average ionic strength 0.159 M  
 Average temperature 25.0°C  
 Partition ratio 0.2728 : 1  
 Analyte concentration range 1875.6 µM to 1985.9 µM  
 Total points considered 43 of 56

**Warnings and errors**

Errors None  
 Warnings None

**Sample**

SKN-7-022-2 concentration factor 0.885  
 Acid pKa 1 10.30  
 logP (neutral XH) 2.59  
 logP (X-) 3.25

**Sample graphs**

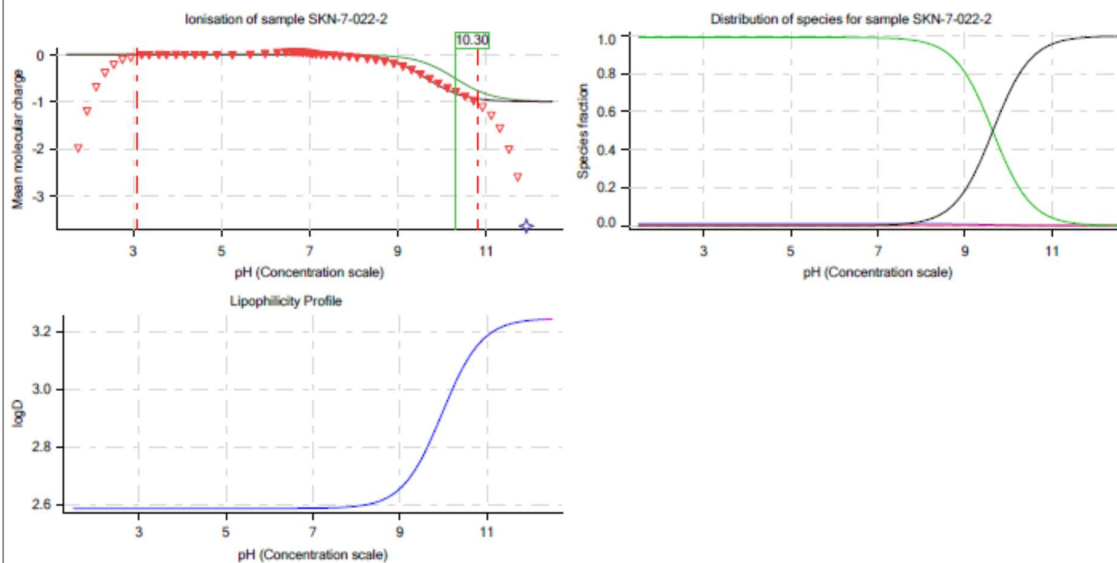

**Sample logD and percent species**

| pH    | SKN-7-022-2<br>logD | SKN-7-022-2<br>SKN-7-022-2H | SKN-7-022-2<br>SKN-7-022-2 | SKN-7-022-2<br>SKN-7-022-2H* | SKN-7-022-2<br>SKN-7-022-2* | Comment    |
|-------|---------------------|-----------------------------|----------------------------|------------------------------|-----------------------------|------------|
| 1.000 | 2.59                | 0.94 %                      | 0.00 %                     | 99.06 %                      | 0.00 %                      | Stomach pH |
| 1.200 | 2.59                | 0.94 %                      | 0.00 %                     | 99.06 %                      | 0.00 %                      |            |
| 2.000 | 2.59                | 0.94 %                      | 0.00 %                     | 99.06 %                      | 0.00 %                      |            |
| 3.000 | 2.59                | 0.94 %                      | 0.00 %                     | 99.06 %                      | 0.00 %                      |            |
| 4.000 | 2.59                | 0.94 %                      | 0.00 %                     | 99.06 %                      | 0.00 %                      |            |
| 5.000 | 2.59                | 0.94 %                      | 0.00 %                     | 99.06 %                      | 0.00 %                      |            |

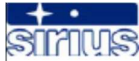

pH-metric

Sample name: SKN-7-022-2  
Assay name: pH-metric medium logP  
Assay ID: 16I-01008  
Filename: D:\data\Customer\16I-01008\_SKN-7-022-2\_pH-metric medium logP.t3r  
Experiment start time: 9/1/2016 9:03:46 AM  
Analyst:  
Instrument ID: T310022

Sample logD and percent species (continued)

| pH     | SKN-7-022-2<br>logD | SKN-7-022-2<br>SKN-7-022-2H | SKN-7-022-2<br>SKN-7-022-2 | SKN-7-022-2<br>SKN-7-022-2H <sup>+</sup> | SKN-7-022-2<br>SKN-7-022-2 <sup>*</sup> | Comment  |
|--------|---------------------|-----------------------------|----------------------------|------------------------------------------|-----------------------------------------|----------|
| 6.000  | 2.59                | 0.94 %                      | 0.00 %                     | 99.04 %                                  | 0.02 %                                  |          |
| 6.500  | 2.59                | 0.94 %                      | 0.00 %                     | 98.99 %                                  | 0.07 %                                  |          |
| 7.000  | 2.59                | 0.94 %                      | 0.00 %                     | 98.83 %                                  | 0.23 %                                  |          |
| 7.400  | 2.59                | 0.94 %                      | 0.00 %                     | 98.50 %                                  | 0.57 %                                  | Blood pH |
| 8.000  | 2.59                | 0.92 %                      | 0.00 %                     | 96.86 %                                  | 2.22 %                                  |          |
| 9.000  | 2.65                | 0.77 %                      | 0.04 %                     | 80.73 %                                  | 18.47 %                                 |          |
| 10.000 | 2.93                | 0.29 %                      | 0.14 %                     | 30.29 %                                  | 69.28 %                                 |          |
| 11.000 | 3.19                | 0.04 %                      | 0.20 %                     | 4.18 %                                   | 95.58 %                                 |          |
| 12.000 | 3.24                | 0.00 %                      | 0.21 %                     | 0.43 %                                   | 99.35 %                                 |          |

Carbonate and acidity

Carbonate 0.440 mM  
Acidity error 0.335 mM

Other graphs

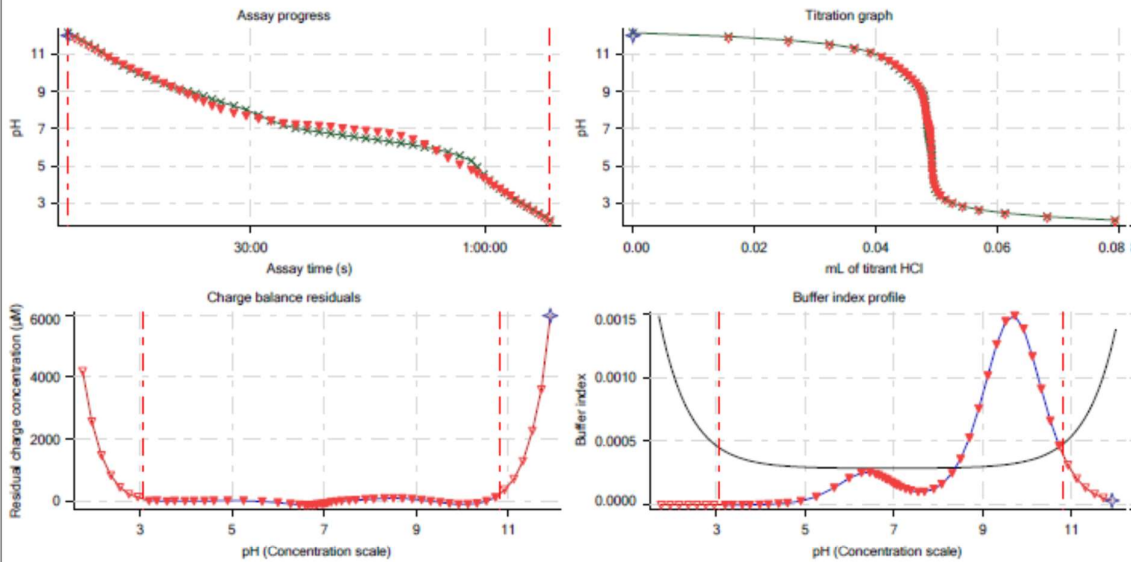

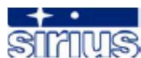

pH-metric

Sample name: SKN-7-022-2  
Assay name: pH-metric medium logP  
Assay ID: 16I-01008  
Filename: D:\data\Customer\16I-01008\_SKN-7-022-2\_pH-metric medium logP.t3r

Experiment start time: 9/1/2016 9:03:46 AM  
Analyst:  
Instrument ID: T310022

Other graphs (continued)

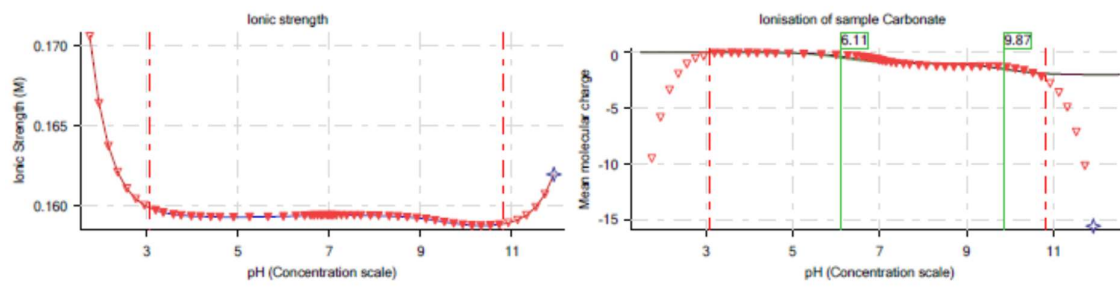

pH-metric Log P of compounds **15a**

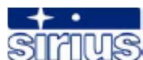

pH-metric

Sample name: **SKN-7-022-1** Experiment start time: 9/1/2016 6:47:11 AM  
 Assay name: pH-metric medium logP Analyst:  
 Assay ID: 16I-01006 Instrument ID: T310022  
 Filename: D:\data\Customer\16I-01006\_SKN-7-022-1\_pH-metric medium logPt3r

**Overall results**

RMSD 0.252  
 Average ionic strength 0.159 M  
 Average temperature 25.0°C  
 Partition ratio 0.2740 : 1  
 Analyte concentration range 1598.6 µM to 1689.8 µM  
 Total points considered 38 of 54

**Warnings and errors**

Errors None  
 Warnings Sample concentration factor out of range

**Sample**

SKN-7-022-1 concentration factor 0.635  
 Acid pKa 1 10.60  
 logP (neutral XH) 3.74  
 logP (X-) 5.35

**Sample graphs**

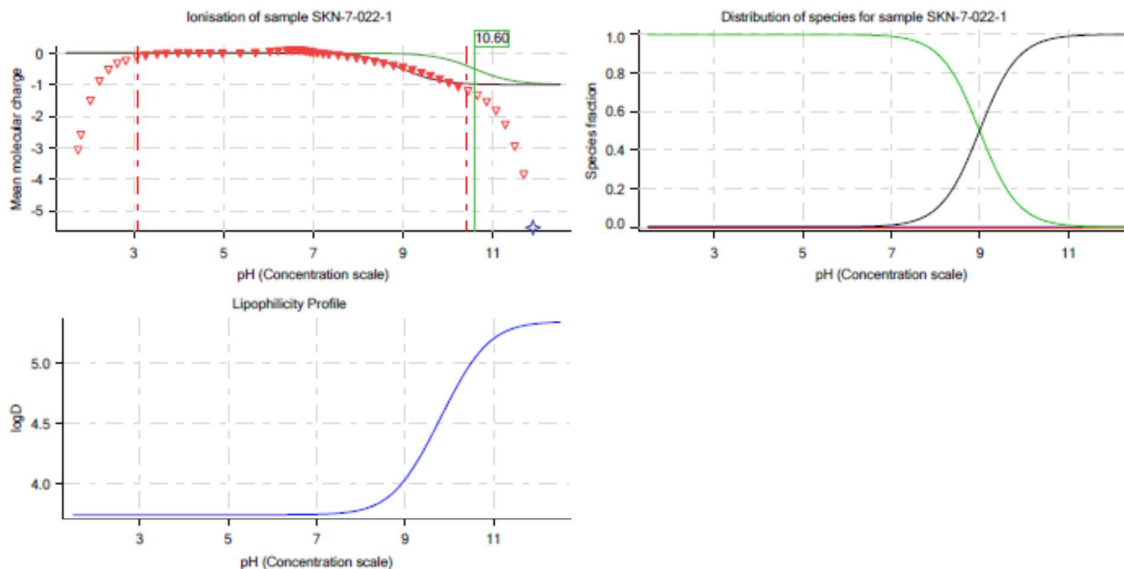

**Sample logD and percent species**

| pH    | SKN-7-022-1<br>logD | SKN-7-022-1<br>SKN-7-022-1H | SKN-7-022-1<br>SKN-7-022-1 | SKN-7-022-1<br>SKN-7-022-1H* | SKN-7-022-1<br>SKN-7-022-1* | Comment    |
|-------|---------------------|-----------------------------|----------------------------|------------------------------|-----------------------------|------------|
| 1.000 | 3.74                | 0.07 %                      | 0.00 %                     | 99.93 %                      | 0.00 %                      | Stomach pH |
| 1.200 | 3.74                | 0.07 %                      | 0.00 %                     | 99.93 %                      | 0.00 %                      |            |
| 2.000 | 3.74                | 0.07 %                      | 0.00 %                     | 99.93 %                      | 0.00 %                      |            |
| 3.000 | 3.74                | 0.07 %                      | 0.00 %                     | 99.93 %                      | 0.00 %                      |            |
| 4.000 | 3.74                | 0.07 %                      | 0.00 %                     | 99.93 %                      | 0.00 %                      |            |
| 5.000 | 3.74                | 0.07 %                      | 0.00 %                     | 99.92 %                      | 0.01 %                      |            |

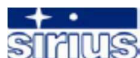

pH-metric

Sample name: SKN-7-022-1  
Assay name: pH-metric medium logP  
Assay ID: 16I-01006  
Filename: D:\data\Customer\16I-01006\_SKN-7-022-1\_pH-metric medium logP.t3r

Experiment start time: 9/1/2016 6:47:11 AM  
Analyst:  
Instrument ID: T310022

Sample logD and percent species (continued)

| pH     | SKN-7-022-1<br>logD | SKN-7-022-1<br>SKN-7-022-1H | SKN-7-022-1<br>SKN-7-022-1 | SKN-7-022-1<br>SKN-7-022-1H* | SKN-7-022-1<br>SKN-7-022-1* | Comment  |
|--------|---------------------|-----------------------------|----------------------------|------------------------------|-----------------------------|----------|
| 6.000  | 3.74                | 0.07 %                      | 0.00 %                     | 99.83 %                      | 0.10 %                      |          |
| 6.500  | 3.74                | 0.07 %                      | 0.00 %                     | 99.61 %                      | 0.32 %                      |          |
| 7.000  | 3.74                | 0.07 %                      | 0.00 %                     | 98.92 %                      | 1.01 %                      |          |
| 7.400  | 3.75                | 0.06 %                      | 0.00 %                     | 97.44 %                      | 2.50 %                      | Blood pH |
| 8.000  | 3.78                | 0.06 %                      | 0.00 %                     | 90.69 %                      | 9.25 %                      |          |
| 9.000  | 4.03                | 0.03 %                      | 0.00 %                     | 49.48 %                      | 50.49 %                     |          |
| 10.000 | 4.69                | 0.01 %                      | 0.00 %                     | 8.92 %                       | 91.07 %                     |          |
| 11.000 | 5.21                | 0.00 %                      | 0.00 %                     | 0.97 %                       | 99.03 %                     |          |
| 12.000 | 5.33                | 0.00 %                      | 0.00 %                     | 0.10 %                       | 99.90 %                     |          |

Carbonate and acidity

Carbonate 0.467 mM  
Acidity error 0.263 mM

Other graphs

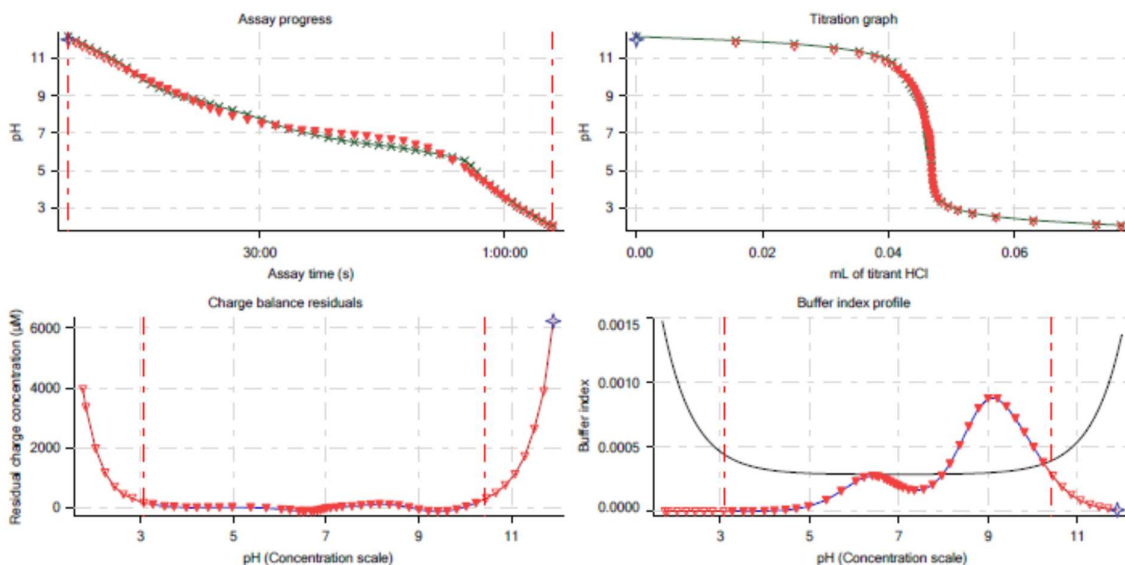



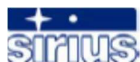

pH-metric

Sample name: SKN-7-022-1  
Assay name: pH-metric medium logP  
Assay ID: 16I-01006  
Filename: D:\data\Customer\16I-01006\_SKN-7-022-1\_pH-metric medium logP.t3r

Experiment start time: 9/1/2016 6:47:11 AM  
Analyst:  
Instrument ID: T310022

Other graphs (continued)

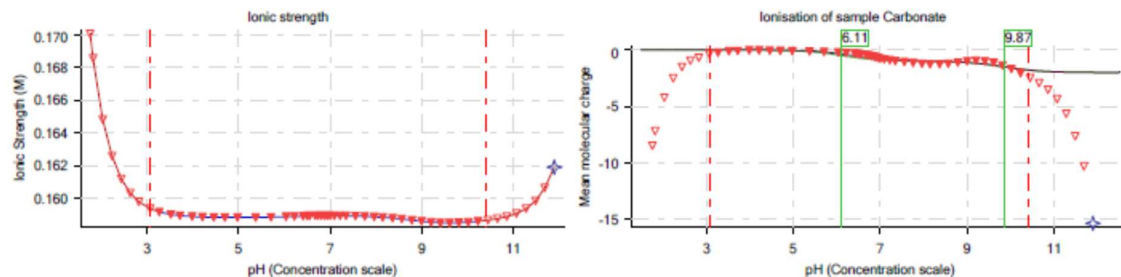

pH-metric Log P of compounds **16a**

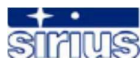

pH-metric

Sample name: **SKN-7-027** Experiment start time: 9/1/2016 11:12:29 AM  
 Assay name: pH-metric medium logP Analyst:  
 Assay ID: 16I-01010 Instrument ID: T310022  
 Filename: D:\data\Customer\16I-01010\_SKN-7-027\_pH-metric medium logP.t3r

**Overall results**

RMSD 0.313  
 Average ionic strength 0.159 M  
 Average temperature 25.0°C  
 Partition ratio 0.2737 : 1  
 Analyte concentration range 1862.4 µM to 1969.3 µM  
 Total points considered 60 of 71

**Warnings and errors**

Errors None  
 Warnings Sample concentration factor out of range  
 Excessive carbonate concentration present

**Sample**

SKN-7-027 concentration factor 0.622  
 Acid pKa 1 10.80  
 logP (neutral XH) 4.95  
 logP (X-) 7.34

**Sample graphs**

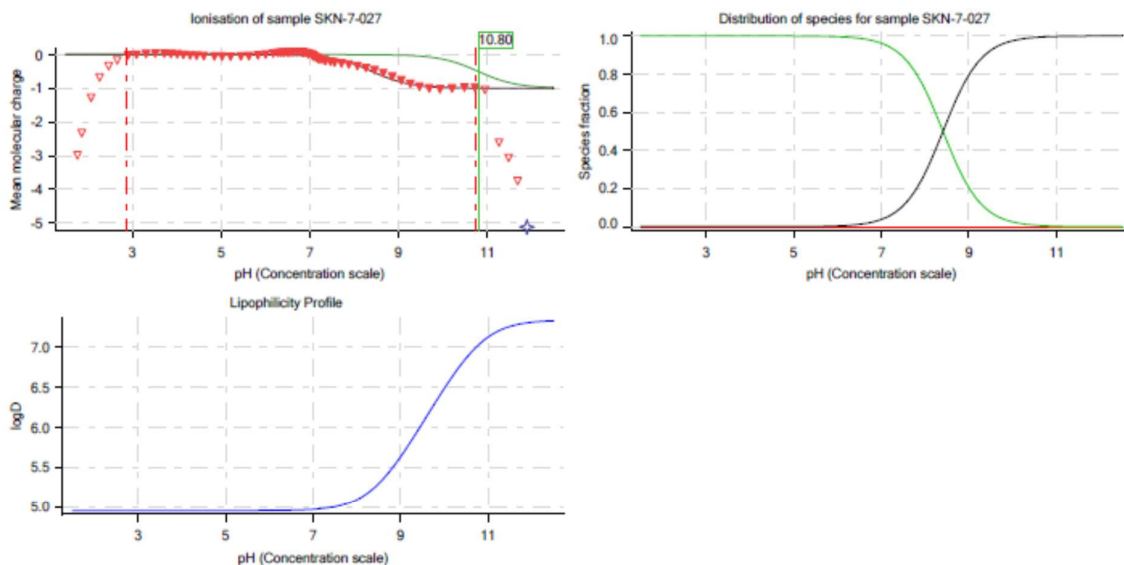

**Sample logD and percent species**

| pH    | SKN-7-027 logD | SKN-7-027 SKN-7-027H | SKN-7-027 SKN-7-027 | SKN-7-027 SKN-7-027H* | SKN-7-027 SKN-7-027* | Comment    |
|-------|----------------|----------------------|---------------------|-----------------------|----------------------|------------|
| 1.000 | 4.95           | 0.00 %               | 0.00 %              | 100.00 %              | 0.00 %               |            |
| 1.200 | 4.95           | 0.00 %               | 0.00 %              | 100.00 %              | 0.00 %               | Stomach pH |
| 2.000 | 4.95           | 0.00 %               | 0.00 %              | 100.00 %              | 0.00 %               |            |
| 3.000 | 4.95           | 0.00 %               | 0.00 %              | 100.00 %              | 0.00 %               |            |
| 4.000 | 4.95           | 0.00 %               | 0.00 %              | 99.99 %               | 0.00 %               |            |

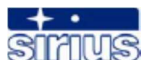

pH-metric

Sample name: SKN-7-027  
Assay name: pH-metric medium logP  
Assay ID: 16I-01010  
Filename: D:\data\Customer\16I-01010\_SKN-7-027\_pH-metric medium logP.t3r  
Experiment start time: 9/1/2016 11:12:29 AM  
Analyst:  
Instrument ID: T310022

Sample logD and percent species (continued)

| pH     | SKN-7-027<br>logD | SKN-7-027<br>SKN-7-027H | SKN-7-027<br>SKN-7-027 | SKN-7-027<br>SKN-7-027H* | SKN-7-027<br>SKN-7-027* | Comment  |
|--------|-------------------|-------------------------|------------------------|--------------------------|-------------------------|----------|
| 5.000  | 4.95              | 0.00 %                  | 0.00 %                 | 99.96 %                  | 0.04 %                  |          |
| 6.000  | 4.95              | 0.00 %                  | 0.00 %                 | 99.61 %                  | 0.39 %                  |          |
| 6.500  | 4.96              | 0.00 %                  | 0.00 %                 | 98.77 %                  | 1.22 %                  |          |
| 7.000  | 4.97              | 0.00 %                  | 0.00 %                 | 96.23 %                  | 3.76 %                  |          |
| 7.400  | 4.99              | 0.00 %                  | 0.00 %                 | 91.05 %                  | 8.95 %                  | Blood pH |
| 8.000  | 5.09              | 0.00 %                  | 0.00 %                 | 71.88 %                  | 28.12 %                 |          |
| 9.000  | 5.63              | 0.00 %                  | 0.00 %                 | 20.36 %                  | 79.64 %                 |          |
| 10.000 | 6.49              | 0.00 %                  | 0.00 %                 | 2.49 %                   | 97.51 %                 |          |
| 11.000 | 7.13              | 0.00 %                  | 0.00 %                 | 0.26 %                   | 99.74 %                 |          |
| 12.000 | 7.32              | 0.00 %                  | 0.00 %                 | 0.03 %                   | 99.97 %                 |          |

Carbonate and acidity

Carbonate 0.738 mM  
Acidity error -0.958 mM

Other graphs

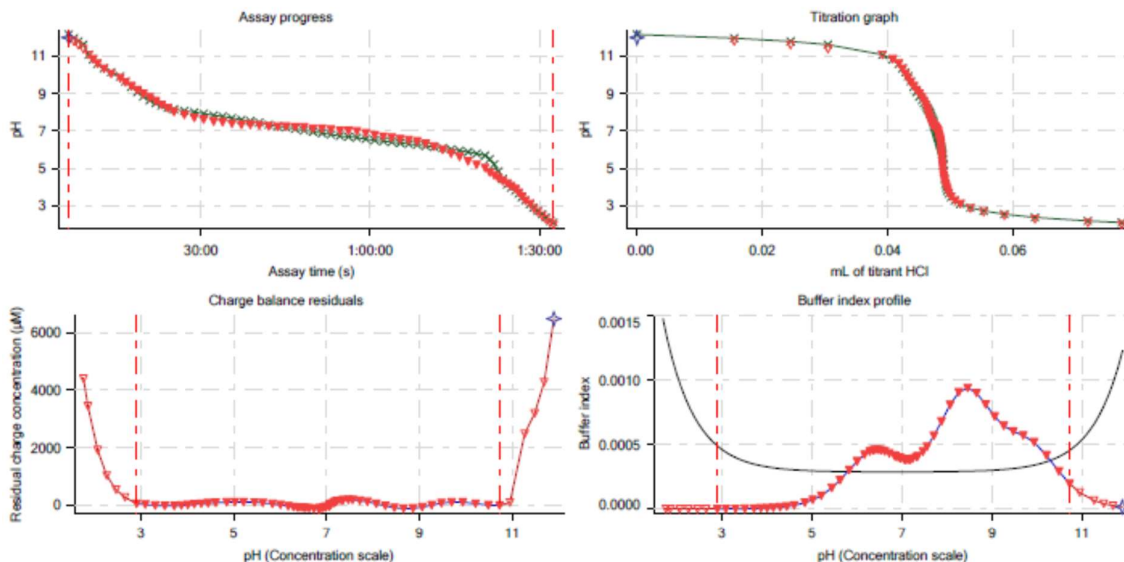

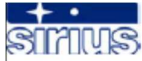

Sample name: SKN-7-027  
Assay name: pH-metric medium logP  
Assay ID: 16I-01010  
Filename: D:\data\Customer\16I-01010\_SKN-7-027\_pH-metric medium logP.t3r

Experiment start time: 9/1/2016 11:12:29 AM  
Analyst:  
Instrument ID: T310022

Other graphs (continued)

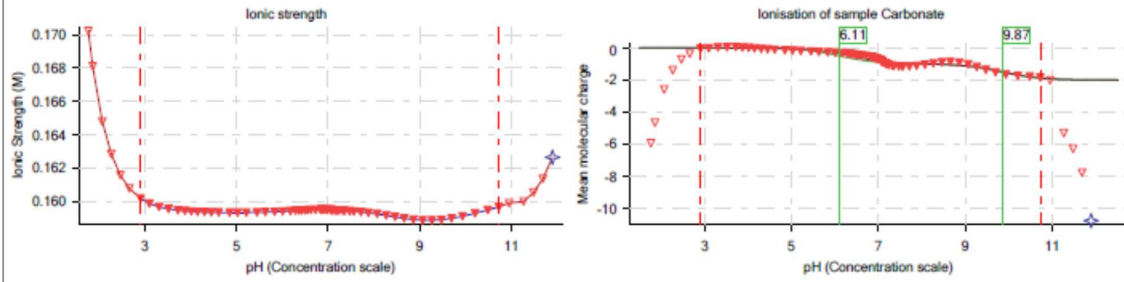

pH-metric Log P of compounds **16b**

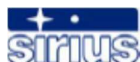

pH-metric

Sample name: SKN-7-026 Experiment start time: 9/1/2016 10:12:57 AM  
 Assay name: pH-metric medium logP Analyst:  
 Assay ID: 16I-01009 Instrument ID: T310022  
 Filename: D:\data\Customer\16I-01009\_SKN-7-026\_pH-metric medium logP.t3r

**Overall results**

RMSD 0.203  
 Average ionic strength 0.159 M  
 Average temperature 25.0°C  
 Partition ratio 0.2739 : 1  
 Analyte concentration range 1795.3 µM to 1900.1 µM  
 Total points considered 34 of 48

**Warnings and errors**

Errors None  
 Warnings None

**Sample**

SKN-7-026 concentration factor 0.732  
 Acid pKa 1 10.10  
 logP (neutral XH) 3.04  
 logP (X-) 3.82

**Sample graphs**

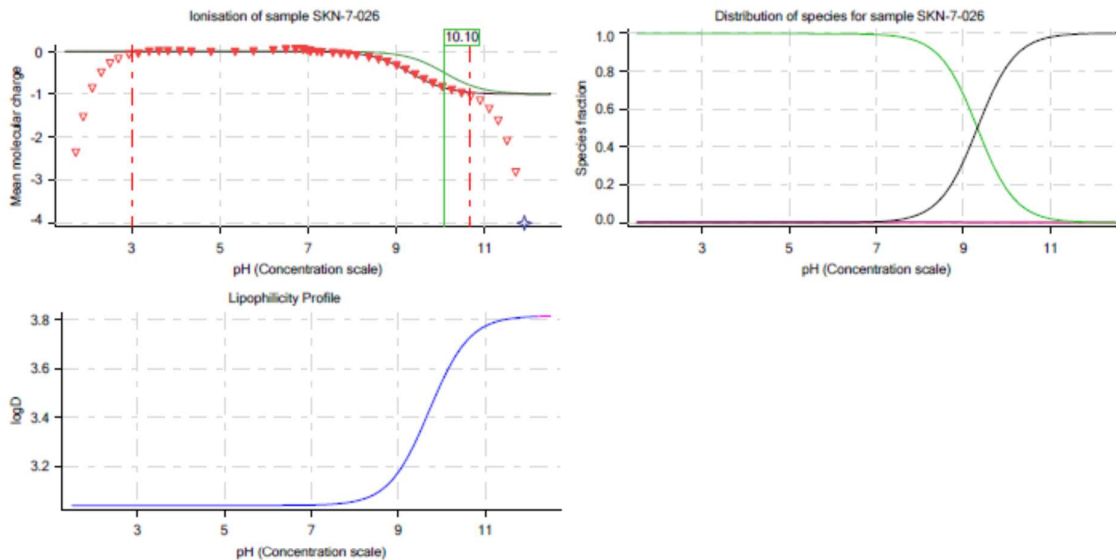

**Sample logD and percent species**

| pH    | SKN-7-026 logD | SKN-7-026 SKN-7-026H | SKN-7-026 SKN-7-026 | SKN-7-026 SKN-7-026H* | SKN-7-026 SKN-7-026* | Comment    |
|-------|----------------|----------------------|---------------------|-----------------------|----------------------|------------|
| 1.000 | 3.04           | 0.33 %               | 0.00 %              | 99.67 %               | 0.00 %               | Stomach pH |
| 1.200 | 3.04           | 0.33 %               | 0.00 %              | 99.67 %               | 0.00 %               |            |
| 2.000 | 3.04           | 0.33 %               | 0.00 %              | 99.67 %               | 0.00 %               |            |
| 3.000 | 3.04           | 0.33 %               | 0.00 %              | 99.67 %               | 0.00 %               |            |
| 4.000 | 3.04           | 0.33 %               | 0.00 %              | 99.67 %               | 0.00 %               |            |
| 5.000 | 3.04           | 0.33 %               | 0.00 %              | 99.66 %               | 0.00 %               |            |

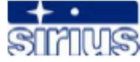

pH-metric

Sample name: SKN-7-026  
Assay name: pH-metric medium logP  
Assay ID: 16I-01009  
Filename: D:\data\Customer\16I-01009\_SKN-7-026\_pH-metric medium logP.t3r  
Experiment start time: 9/1/2016 10:12:57 AM  
Analyst:  
Instrument ID: T310022

Sample logD and percent species (continued)

| pH     | SKN-7-026<br>logD | SKN-7-026<br>SKN-7-026H | SKN-7-026<br>SKN-7-026 | SKN-7-026<br>SKN-7-026H* | SKN-7-026<br>SKN-7-026* | Comment  |
|--------|-------------------|-------------------------|------------------------|--------------------------|-------------------------|----------|
| 6.000  | 3.04              | 0.33 %                  | 0.00 %                 | 99.62 %                  | 0.05 %                  |          |
| 6.500  | 3.04              | 0.33 %                  | 0.00 %                 | 99.52 %                  | 0.15 %                  |          |
| 7.000  | 3.04              | 0.33 %                  | 0.00 %                 | 99.20 %                  | 0.47 %                  |          |
| 7.400  | 3.04              | 0.33 %                  | 0.00 %                 | 98.50 %                  | 1.17 %                  | Blood pH |
| 8.000  | 3.06              | 0.32 %                  | 0.00 %                 | 95.16 %                  | 4.52 %                  |          |
| 9.000  | 3.18              | 0.23 %                  | 0.02 %                 | 67.64 %                  | 32.11 %                 |          |
| 10.000 | 3.55              | 0.06 %                  | 0.05 %                 | 17.38 %                  | 82.52 %                 |          |
| 11.000 | 3.77              | 0.01 %                  | 0.05 %                 | 2.06 %                   | 97.88 %                 |          |
| 12.000 | 3.81              | 0.00 %                  | 0.06 %                 | 0.21 %                   | 99.73 %                 |          |

Carbonate and acidity

Carbonate 0.431 mM  
Acidity error 0.777 mM

Other graphs

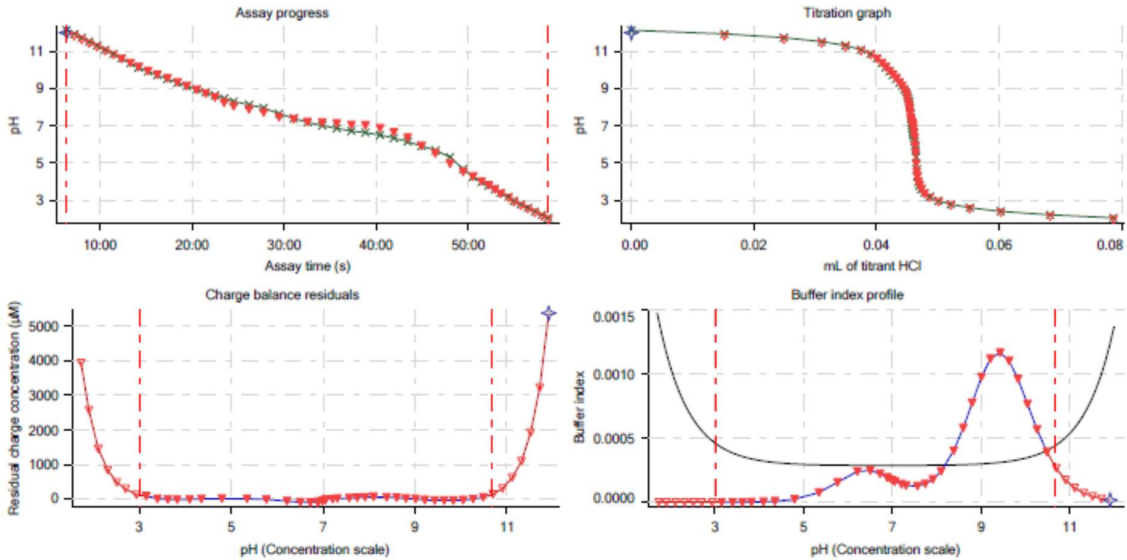

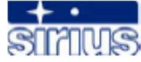

pH-metric

Sample name: SKN-7-026  
Assay name: pH-metric medium logP  
Assay ID: 16I-01009  
Filename: D:\data\Customer\16I-01009\_SKN-7-026\_pH-metric medium logP.t3r

Experiment start time: 9/1/2016 10:12:57 AM  
Analyst:  
Instrument ID: T310022

Other graphs (continued)

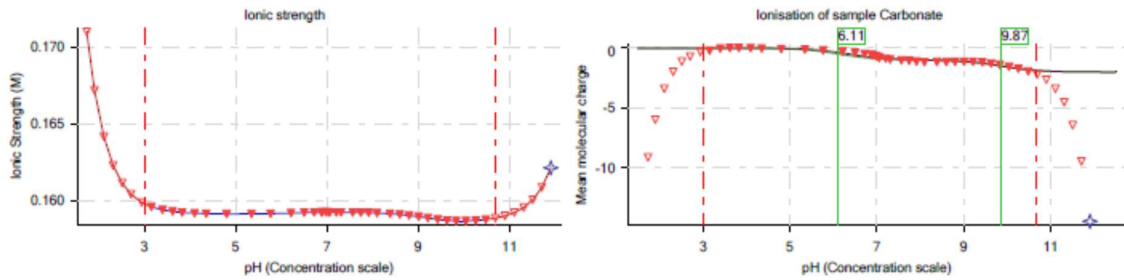

pH-metric Log P of compounds **chlorantraniliprole**

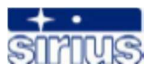

pH-metric

Sample name: TK-1  
 Assay name: pH-metric medium logP  
 Assay ID: 16H-16010  
 Filename: D:\Data\Customer\16H-16010\_TK-1\_pH-metric medium logP.t3r  
 Experiment start time: 16/08/2016 12:55:31  
 Analyst: KRICT  
 Instrument ID: T313101

**Overall results**

RMSD 0.169  
 Average ionic strength 0.158 M  
 Average temperature 25.0°C  
 Partition ratio 0.2765 : 1  
 Analyte concentration range 2039.7 µM to 2171.1 µM  
 Total points considered 32 of 42

**Warnings and errors**

Errors None  
 Warnings None

**Four-Plus parameters**

Alpha 0.210  
 S 1.0000  
 jH 0.1  
 jOH 0.1

**Titrants**

0.50 M HCl 0.982045 16/08/2016 12:55:31 D:\Data\Customer\16H-16006\_Blank standardisation.t3r  
 0.50 M KOH 1.007560 16/08/2016 12:55:31 D:\Data\Customer\16G-19013\_KHP\_Base standardisation using KHP.t3r

**Sample**

TK-1 concentration factor 1.000  
 Acid pKa 1 10.20  
 logP (neutral XH) 5.25  
 logP (X-) 4.35

**Sample graphs**

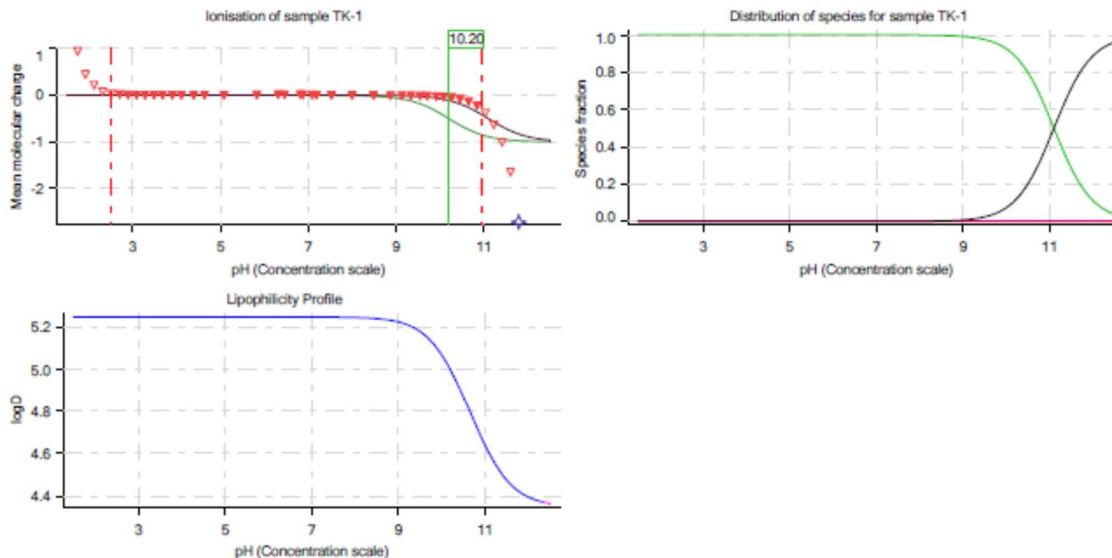



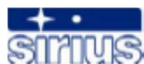

# pH-metric

Sample name: TK-1  
Assay name: pH-metric medium logP  
Assay ID: 16H-16010  
Filename: D:\Data\Customer\16H-16010\_TK-1\_pH-metric medium logP.t3r  
Experiment start time: 16/08/2016 12:55:31  
Analyst: KRICT  
Instrument ID: T313101

## Sample logD and percent species

| pH     | TK-1 logD | TK-1 TK-1H | TK-1 TK-1 | TK-1 TK-1H* | TK-1 TK-1* | Comment    |
|--------|-----------|------------|-----------|-------------|------------|------------|
| 1.000  | 5.25      | 0.00 %     | 0.00 %    | 100.00 %    | 0.00 %     |            |
| 1.200  | 5.25      | 0.00 %     | 0.00 %    | 100.00 %    | 0.00 %     | Stomach pH |
| 2.000  | 5.25      | 0.00 %     | 0.00 %    | 100.00 %    | 0.00 %     |            |
| 3.000  | 5.25      | 0.00 %     | 0.00 %    | 100.00 %    | 0.00 %     |            |
| 4.000  | 5.25      | 0.00 %     | 0.00 %    | 100.00 %    | 0.00 %     |            |
| 5.000  | 5.25      | 0.00 %     | 0.00 %    | 100.00 %    | 0.00 %     |            |
| 6.000  | 5.25      | 0.00 %     | 0.00 %    | 100.00 %    | 0.00 %     |            |
| 6.500  | 5.25      | 0.00 %     | 0.00 %    | 100.00 %    | 0.00 %     |            |
| 7.000  | 5.25      | 0.00 %     | 0.00 %    | 99.99 %     | 0.01 %     |            |
| 7.400  | 5.25      | 0.00 %     | 0.00 %    | 99.98 %     | 0.02 %     | Blood pH   |
| 8.000  | 5.25      | 0.00 %     | 0.00 %    | 99.92 %     | 0.08 %     |            |
| 9.000  | 5.23      | 0.00 %     | 0.00 %    | 99.21 %     | 0.79 %     |            |
| 10.000 | 5.07      | 0.00 %     | 0.00 %    | 92.64 %     | 7.36 %     |            |
| 11.000 | 4.64      | 0.00 %     | 0.01 %    | 55.73 %     | 44.27 %    |            |
| 12.000 | 4.39      | 0.00 %     | 0.01 %    | 11.18 %     | 88.81 %    |            |

## Carbonate and acidity

Carbonate 0.182 mM  
Acidity error 0.680 mM

## Other graphs

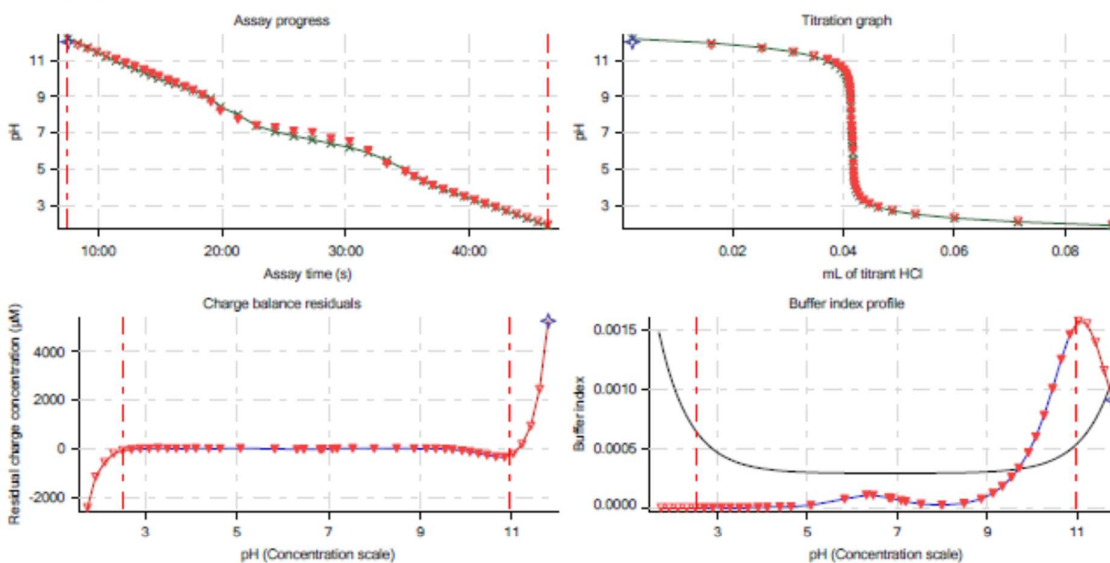

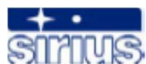

pH-metric

Sample name: TK-1  
Assay name: pH-metric medium logP  
Assay ID: 16H-16010  
Filename: D:\Data\Customer\16H-16010\_TK-1\_pH-metric medium logP.t3r

Experiment start time: 16/08/2016 12:55:31  
Analyst: KRICT  
Instrument ID: T313101

Other graphs (continued)

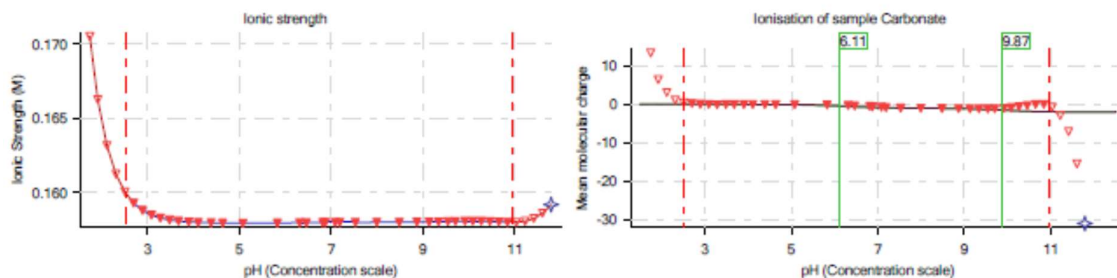

pH-metric Log P of compounds **cyantraniliprole**



pH-metric

Sample name: **SJP-TK-02** Experiment start time: 9/1/2016 3:06:50 AM  
 Assay name: pH-metric medium logP Analyst:  
 Assay ID: 16I-01003 Instrument ID: T310022  
 Filename: D:\data\Customer\16I-01003\_SJP-TK-02\_pH-metric medium logP.t3r

**Overall results**

RMSD 0.360  
 Average ionic strength 0.160 M  
 Average temperature 25.0°C  
 Partition ratio 0.2713 : 1  
 Analyte concentration range 2276.1 µM to 2416.9 µM  
 Total points considered 39 of 51

**Warnings and errors**

Errors None  
 Warnings None

**Sample**

SJP-TK-02 concentration factor 1.292  
 Acid pKa 1 10.20  
 logP (neutral XH) 3.50  
 logP (X-) 3.37

**Sample graphs**

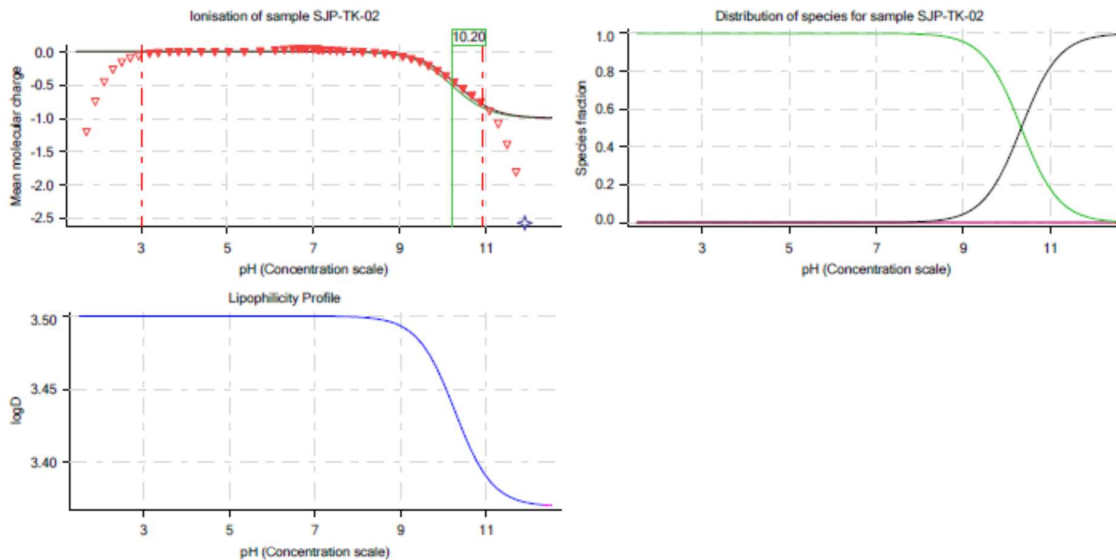

**Sample logD and percent species**

| pH    | SJP-TK-02 logD | SJP-TK-02 SJP-TK-02H | SJP-TK-02 SJP-TK-02 | SJP-TK-02 SJP-TK-02H* | SJP-TK-02 SJP-TK-02* | Comment    |
|-------|----------------|----------------------|---------------------|-----------------------|----------------------|------------|
| 1.000 | 3.50           | 0.12 %               | 0.00 %              | 99.88 %               | 0.00 %               | Stomach pH |
| 1.200 | 3.50           | 0.12 %               | 0.00 %              | 99.88 %               | 0.00 %               |            |
| 2.000 | 3.50           | 0.12 %               | 0.00 %              | 99.88 %               | 0.00 %               |            |
| 3.000 | 3.50           | 0.12 %               | 0.00 %              | 99.88 %               | 0.00 %               |            |
| 4.000 | 3.50           | 0.12 %               | 0.00 %              | 99.88 %               | 0.00 %               |            |
| 5.000 | 3.50           | 0.12 %               | 0.00 %              | 99.88 %               | 0.00 %               |            |

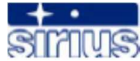

pH-metric

Sample name: SJP-TK-02 Experiment start time: 9/1/2016 3:06:50 AM  
Assay name: pH-metric medium logP Analyst:  
Assay ID: 16I-01003 Instrument ID: T310022  
Filename: D:\data\Customer\16I-01003\_SJP-TK-02\_pH-metric medium logP.t3r

Sample logD and percent species (continued)

| pH     | SJP-TK-02<br>logD | SJP-TK-02<br>SJP-TK-02H | SJP-TK-02<br>SJP-TK-02 | SJP-TK-02<br>SJP-TK-02H* | SJP-TK-02<br>SJP-TK-02* | Comment  |
|--------|-------------------|-------------------------|------------------------|--------------------------|-------------------------|----------|
| 6.000  | 3.50              | 0.12 %                  | 0.00 %                 | 99.88 %                  | 0.00 %                  |          |
| 6.500  | 3.50              | 0.12 %                  | 0.00 %                 | 99.87 %                  | 0.01 %                  |          |
| 7.000  | 3.50              | 0.12 %                  | 0.00 %                 | 99.84 %                  | 0.05 %                  |          |
| 7.400  | 3.50              | 0.12 %                  | 0.00 %                 | 99.77 %                  | 0.12 %                  | Blood pH |
| 8.000  | 3.50              | 0.12 %                  | 0.00 %                 | 99.42 %                  | 0.47 %                  |          |
| 9.000  | 3.49              | 0.11 %                  | 0.01 %                 | 95.42 %                  | 4.46 %                  |          |
| 10.000 | 3.45              | 0.08 %                  | 0.05 %                 | 68.04 %                  | 31.83 %                 |          |
| 11.000 | 3.39              | 0.02 %                  | 0.13 %                 | 17.59 %                  | 82.26 %                 |          |
| 12.000 | 3.37              | 0.00 %                  | 0.15 %                 | 2.09 %                   | 97.75 %                 |          |

Carbonate and acidity

Carbonate 0.481 mM  
Acidity error 0.422 mM

Other graphs

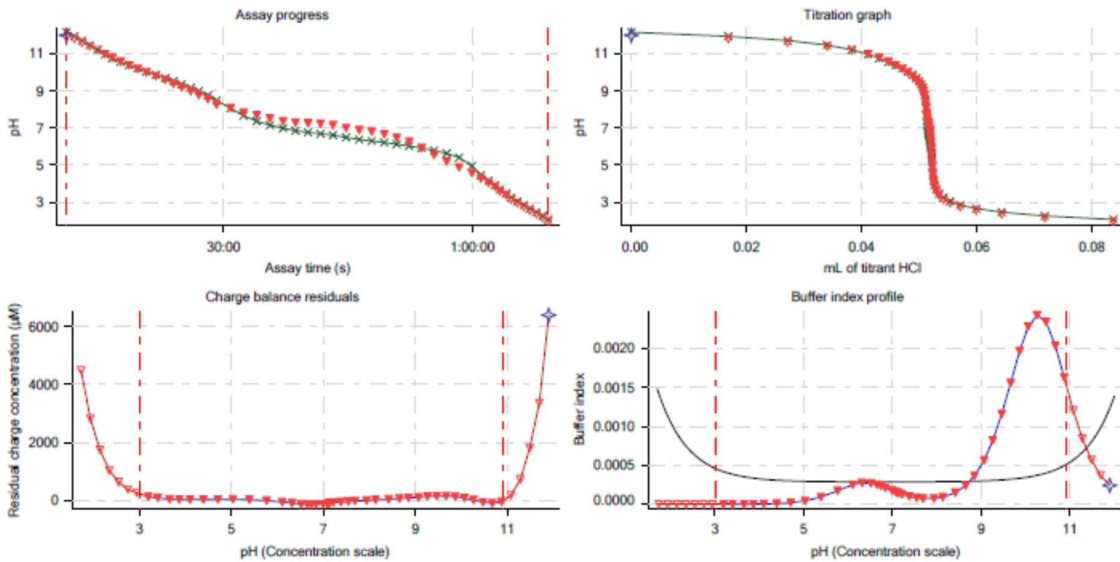



pH-metric

Sample name: SJP-TK-02  
Assay name: pH-metric medium logP  
Assay ID: 16I-01003  
Filename: D:\data\Customer\16I-01003\_SJP-TK-02\_pH-metric medium logP.t3r

Experiment start time: 9/1/2016 3:06:50 AM  
Analyst:  
Instrument ID: T310022

Other graphs (continued)

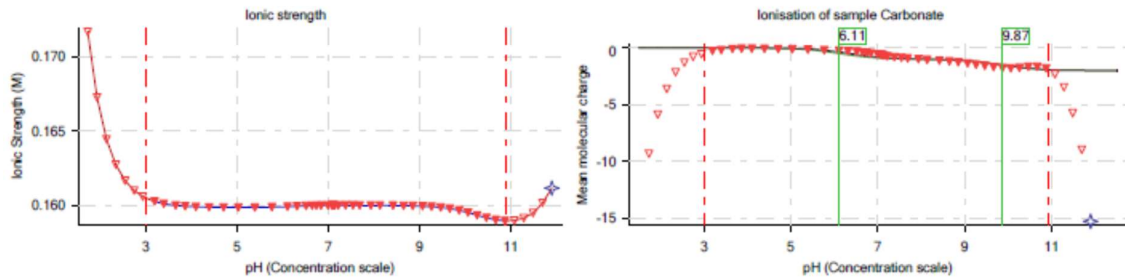

## References

1. (a) S. R. Katamreddy, A. J. Carpenter, C. E. Ammala, E. E. Boros, R. L. Brashear, C. P. Briscoe, S. R. Bullard, R. D. Caldwell, C. R. Conlee, D. K. Croom, S. M. Hart, D. O. Heyer, P. R. Johnson, J. A. Kashatus, D. J. Minick, G. E. Peckham, S. A. Ross, S. G. Roller, V. A. Samano, H. R. Sauls, S. M. Tadepalli, J. B. Thompson, Y. Xu, J. M. Way, *J. Med. Chem.* **2012**, *55*, 10972; (b) J. D. Moseley, E. K. Woodman, *Org. Process Res. Dev.*, **2008**, *12*, 967; (c) Positive allosteric modulators of the nicotinic acetylcholine receptor, D. W. Piotrowski, B. N. Rogers, W. W. Mcwhorter, D. P. Walker, J. W. Corbett, V. E. Groppi, D. G. Rudmann, (Pharmacia & Upjohn Company), WO/2003/093250 A2, 2003.
2. (a) Y. Xu, T. Cong, P. Liu, P. Sun, *Org. Biomol. Chem.*, **2015**, *13*, 9742; (b) P. F. Ranken, B. G. McKinnie, *J. Org. Chem.* **1989**, *54*, 2985.
3. Preparation of aromatic thioethers as intermediates for herbicides, H. Nakagawa, M. Yamaguchi, H. Adachi, JP/2000/319251 A, 2000; (b) 3-thio or amino substituted-benzo[*b*]thiophene-2-carboxamides and 3-oxygen, thio, or amino substituted-benzofuran-2-carboxamides as inhibitors of cell adhesion, D. H. Boschelli, D. T. Connor, J. B. Kramer, P. C. Unangst, US/5350748 A, 1994.
4. *N*-(arylalkyl)-*N'*-pyrazolyl-urea, thiourea, guanidine and cyanoguanidine compounds as trka kinase inhibitors, J. F. Blake, B. J. Brandhuber, J. Haas, B. Newhouse, A. A. Thomas, S. L. Winski, (Array Biopharma Inc.), WO/2014/078331 A1, 2014.
5. A. Guilbault, B. Basdevant, V. Wanie, C. Y. Legault, *J. Org. Chem.*, **2012**, *77*, 11283.
6. (a) S. Zhou, Z. Jia, L. Xiong, T. Yan, N. Yang, G. Wu, H. Song, Z. Li, *J. Agric. Food Chem.* **2014**, *62*, 6269; (b) S. Zhou, Y. Gu, M. Liu, C. Wu, S. Zhou, Y. Zhao, Z. Jia, B. Wang, L. Xiong, N. Yang, Z. Li, *J. Agric. Food Chem.* **2014**, *62*, 11054; (d) X. Hua, W. Mao, Z. Fan, X. Ji, F. Li, G. Zong, H. Song, J. Li, L. Zhou, L. Zhou, X. Liang, G. Wang, X. Chen, *Aust. J. Chem.* **2014**, *67*, 1491.
